# Supplementary material for: Naphthoquinone derivatives as potential immunomodulators: prospective for COVID-19 treatment
Source: Royal Society of Chemistry journal article supplement (doi:10.1039/d3ra08173g), 2024-01-01
Supplement: d3ra08173g1.pdf [file d3ra08173g1.pdf]

## Supplementary Information for:

### Naphthoquinone Derivatives as Potential Immunomodulators: Prospective for COVID-19 Treatment

**Vitor Tassara Moraes<sup>a</sup>, Franco Jazon Caires<sup>a</sup>, Pedro V. da Silva-Neto<sup>b</sup>, Jacqueline Nakau Mendonça<sup>a</sup>, Thais F. C. Fraga-Silva<sup>c,d</sup>, Bianca Bueno Fontanezi<sup>e</sup>, Priscyla Daniely Marcato<sup>e</sup>, Vania Luiza Deperon Bonato<sup>d</sup>, Carlos Arterio Sorgi<sup>b</sup>, Luiz Alberto Beraldo Moraes<sup>b</sup>, Giuliano Cesar Clososki<sup>a\*</sup>**

<sup>a</sup> Departamento de Ciências Biomoleculares, Faculdade de Ciências Farmacêuticas de Ribeirão Preto, Universidade de São Paulo-USP, Ribeirao Preto 14040-903, SP, Brazil.

<sup>b</sup> Departamento de Química, Faculdade de Filosofia, Ciências e Letras de Ribeirão Preto-FFCLRP, Universidade de São Paulo-USP, Ribeirao Preto 14040-901, SP, Brazil.

<sup>c</sup> Instituto de Ciências Biológicas e da Saúde, Universidade Federal de Alagoas- UFAL, Maceió 57072-900, AL, Brazil

<sup>d</sup> Departamento de Bioquímica e Imunologia, Faculdade de Medicina de Ribeirão Preto-FMRP, Universidade de São Paulo-USP, Ribeirao Preto 14040-900, SP, Brazil

<sup>e</sup> Departamento de Ciências Farmacêuticas, Faculdade de Ciências Farmacêuticas de Ribeirão Preto, Universidade de São Paulo-USP, Ribeirão Preto 14040-903

## 1. Experimental spectra

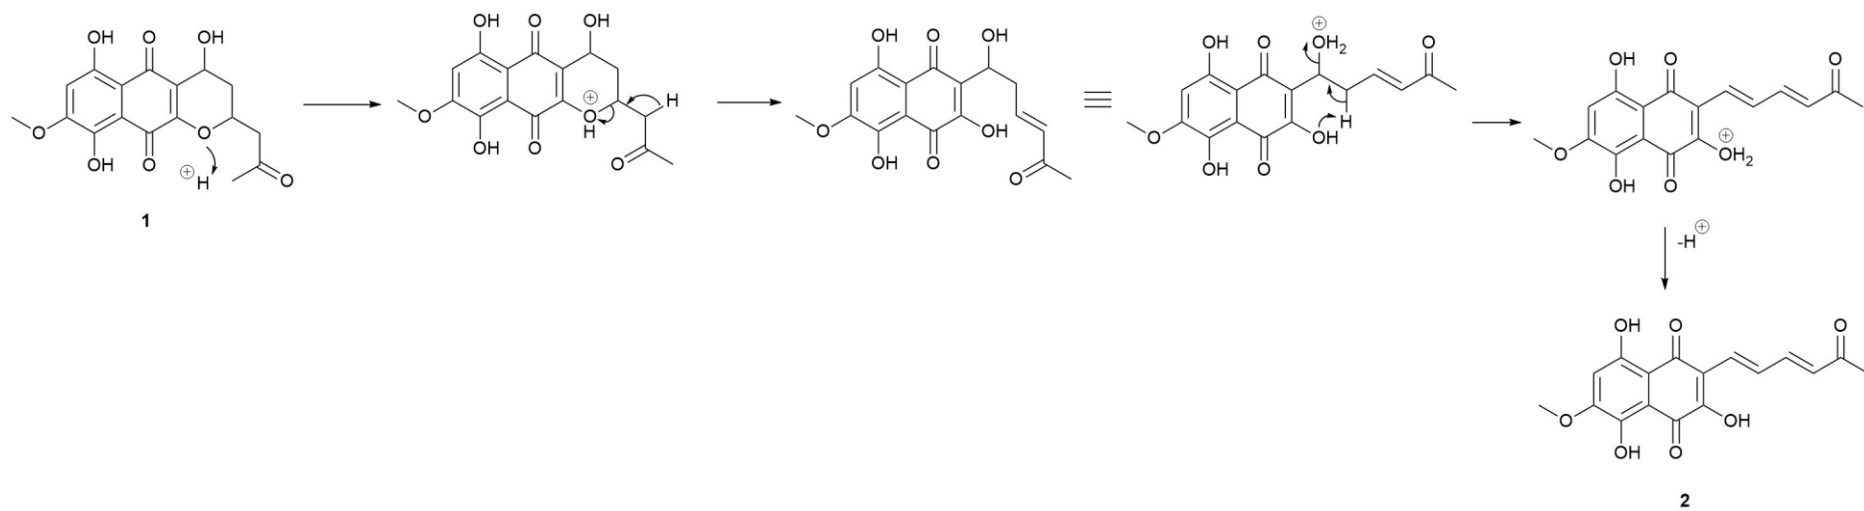

Figure S1. Plausible mechanism for the conversion of Erythrostominone (1) into 3,5,8-TMON (2).

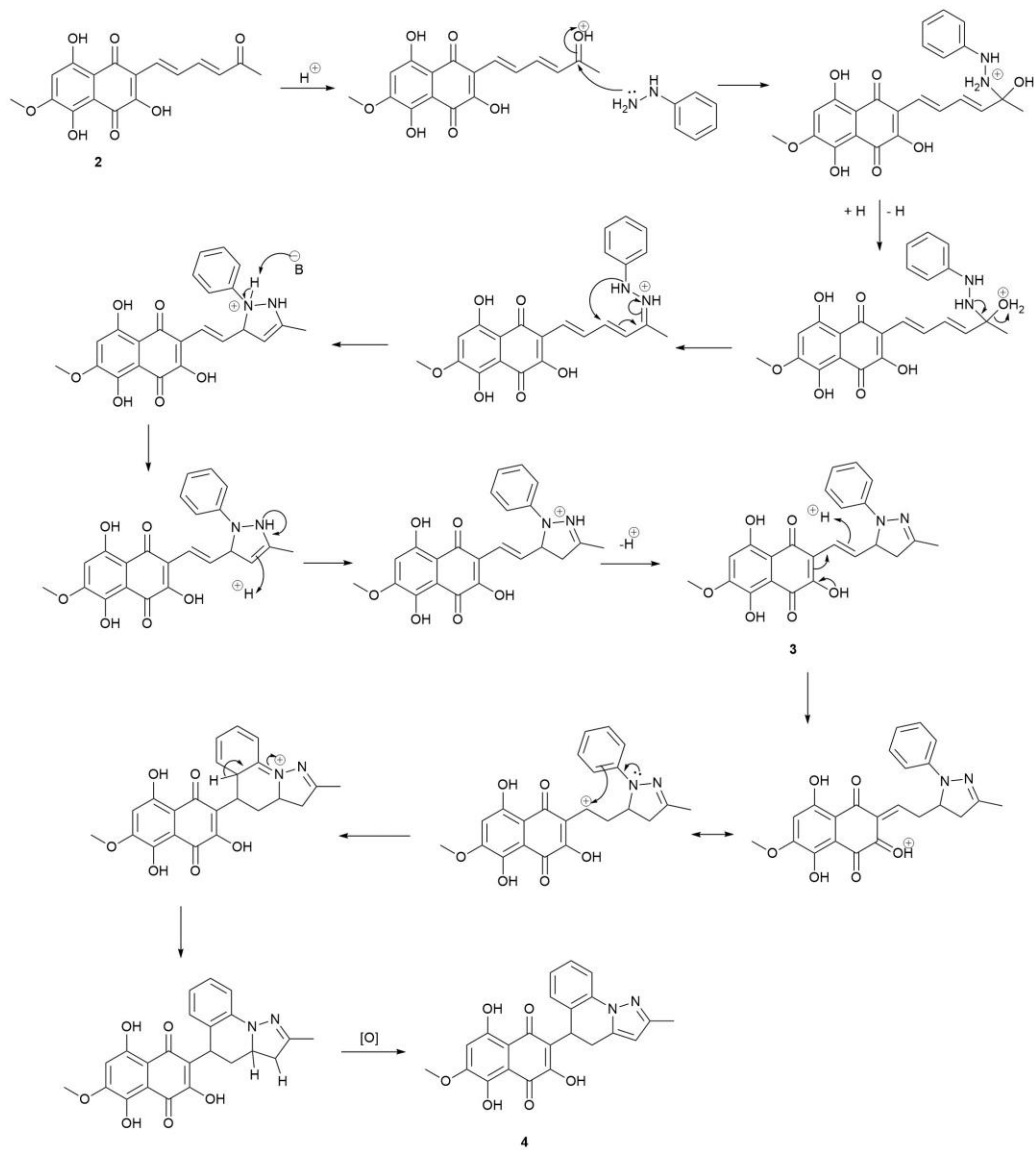

Figure S1. Plausible mechanism for the synthesis of 3 and 4.

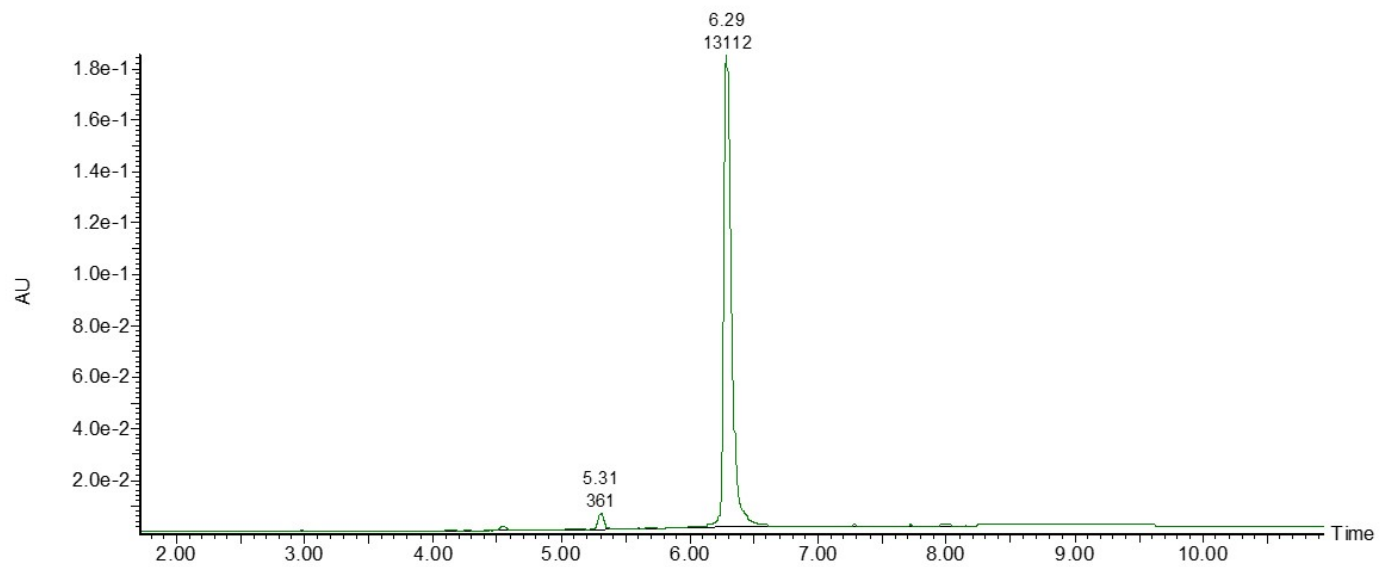

Figure S2. 3,5,8-TMON (2) UPLC-DAD chromatogram. Relative peak purity (97.3%).

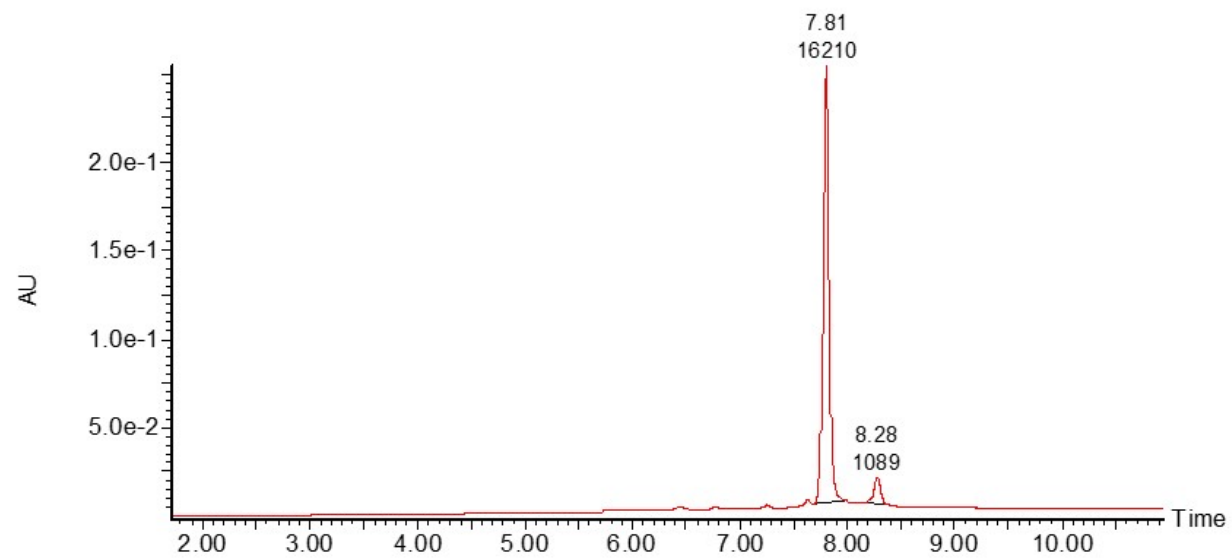

**Figure S3. Compound 3 UPLC-DAD chromatogram. Relative peak purity (93.7%)**

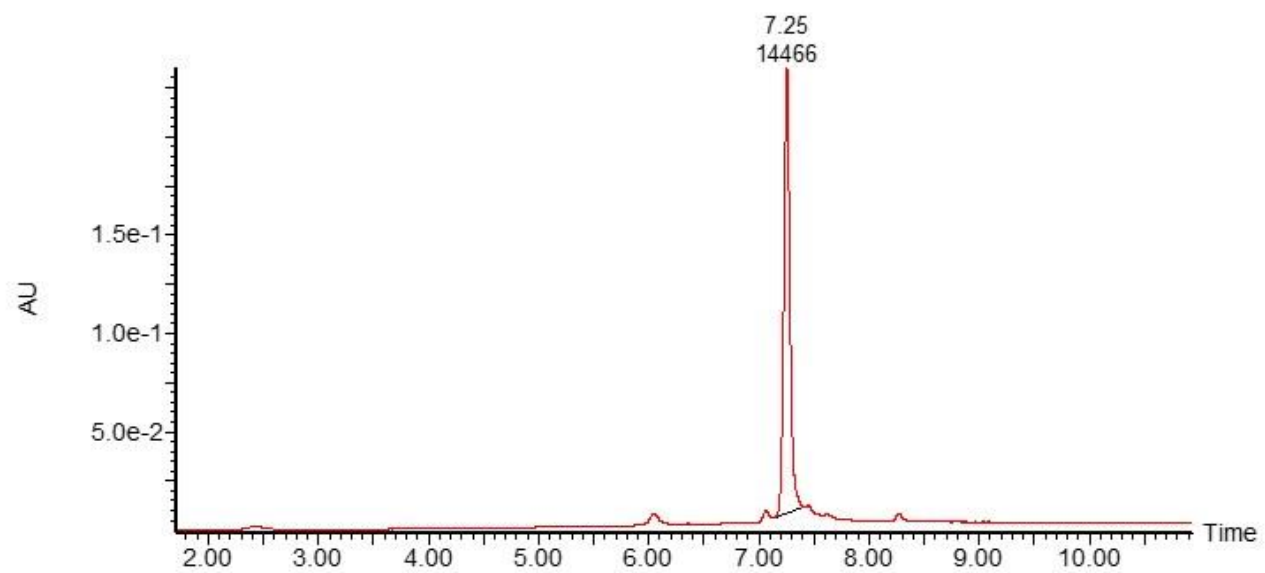

**Figure S4. Compound 4 UPLC-DAD. Relative peak purity (~100%)**

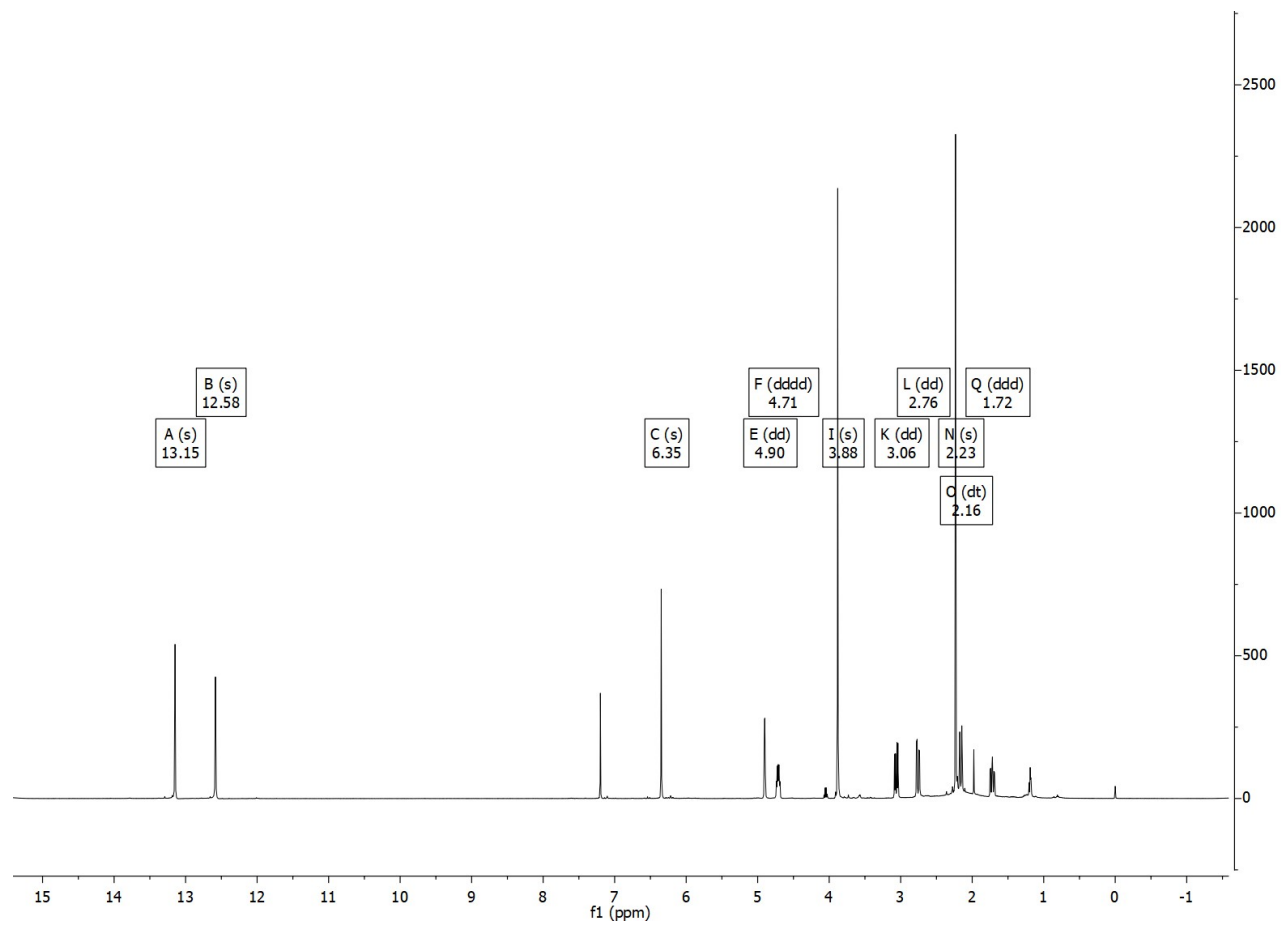

Figure S5. <sup>1</sup>H NMR spectra of Erythrostominone in CdCl<sub>3</sub>, 500 MHz.

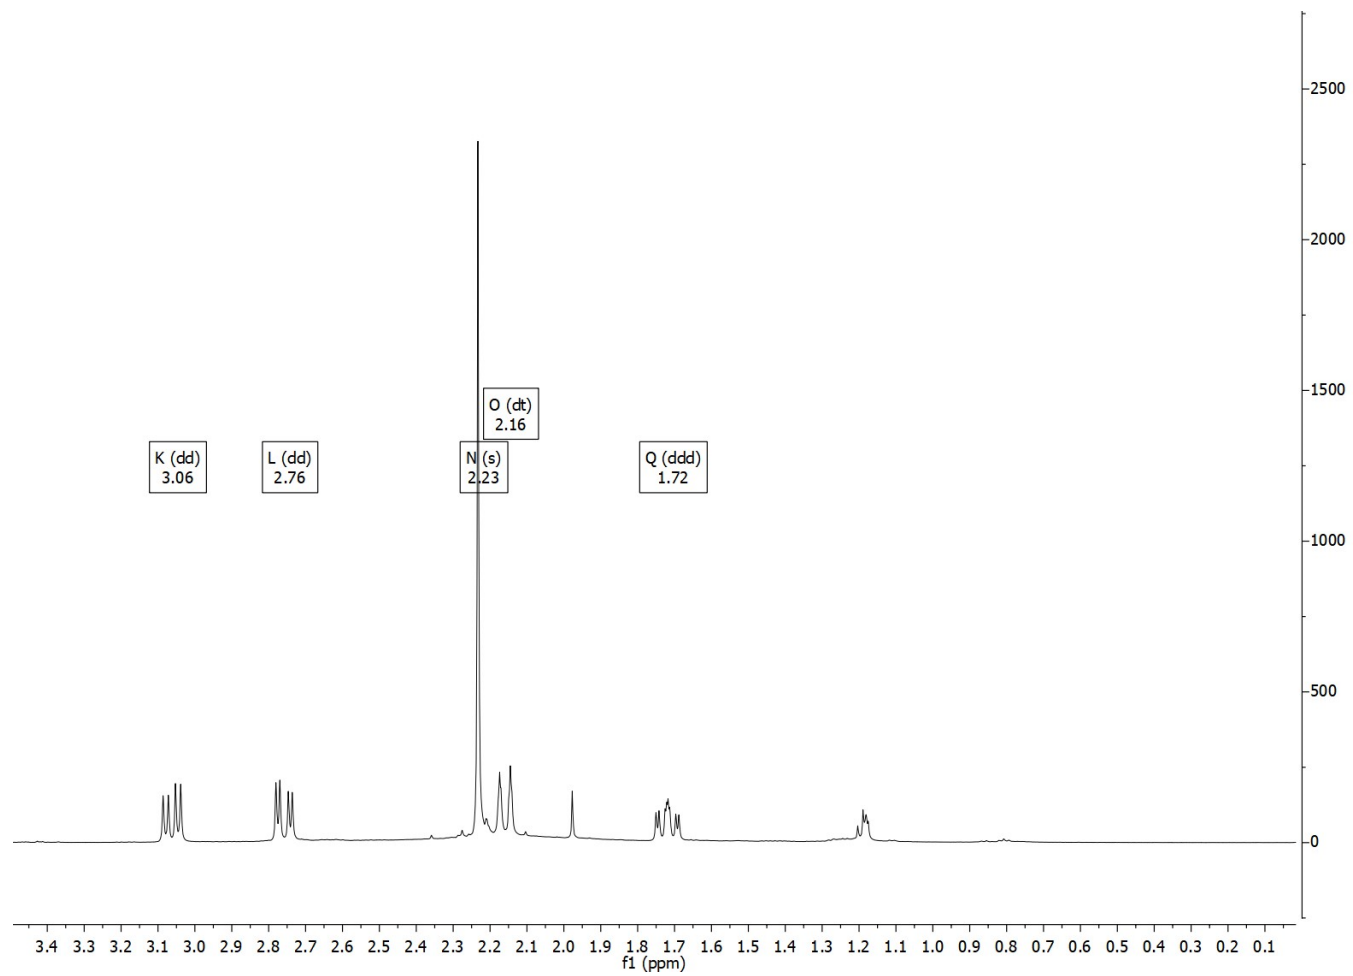

Figure S6. <sup>1</sup>H NMR spectra of Erythrostominone from 0 to 3.5 ppm in CDCl<sub>3</sub>, 500 MHz.



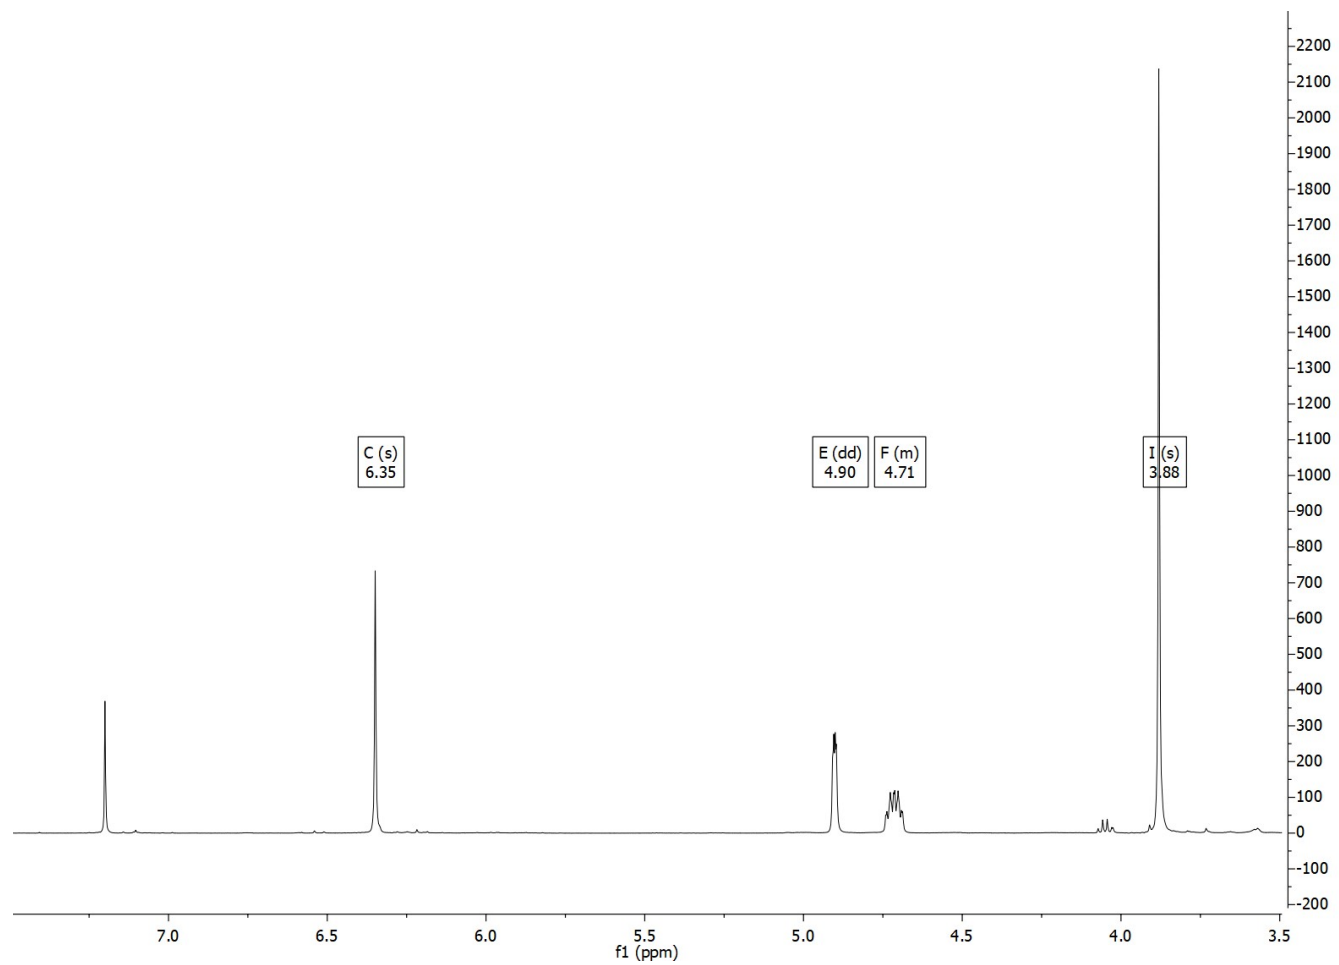

Figure S7.  $^1\text{H}$  NMR spectra of Erythrostominone from 3.5 to 7.5 ppm in  $\text{CDCl}_3$ , 500 MHz.

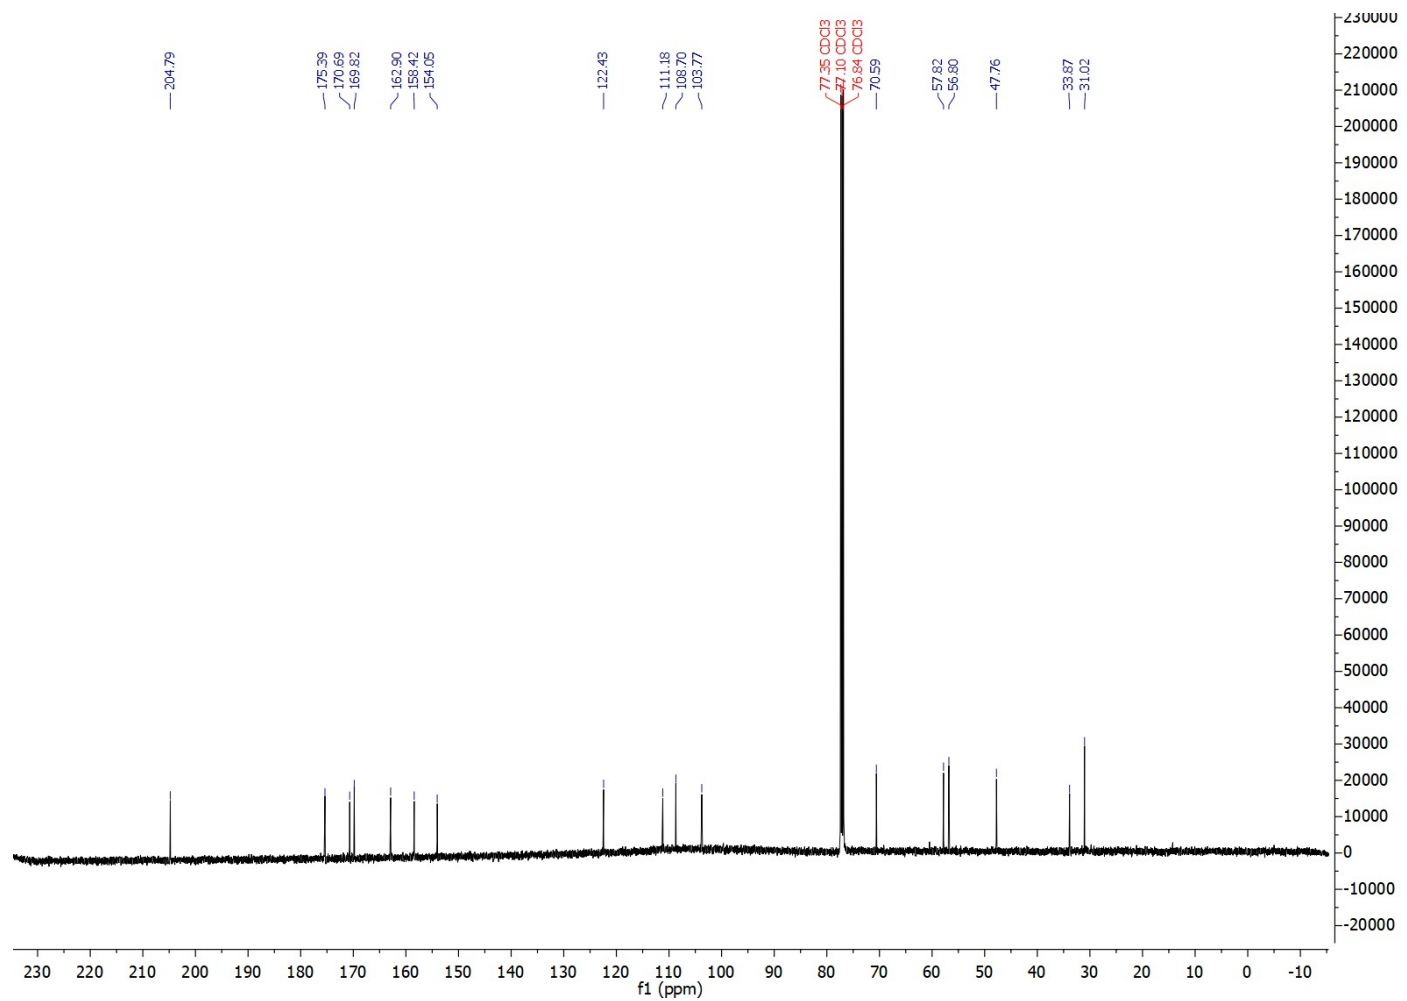

Figure S8.  $^{13}\text{C}$  NMR spectra of Erythrostominone in  $\text{CDCl}_3$ , 125 MHz.

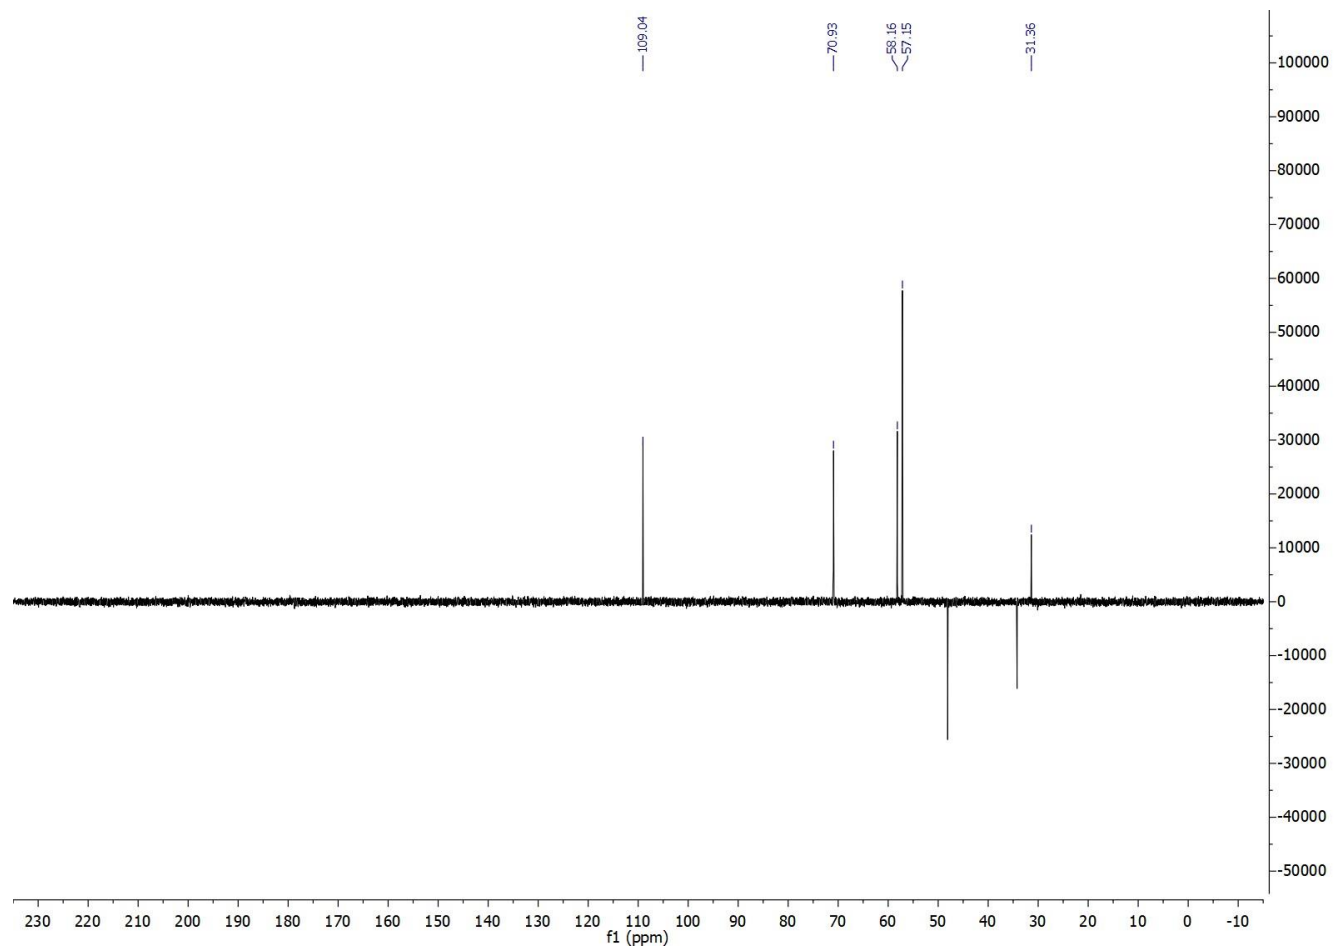

Figure S9. DEPT-136 NMR spectra of Erythrostominone in CDCl<sub>3</sub>.

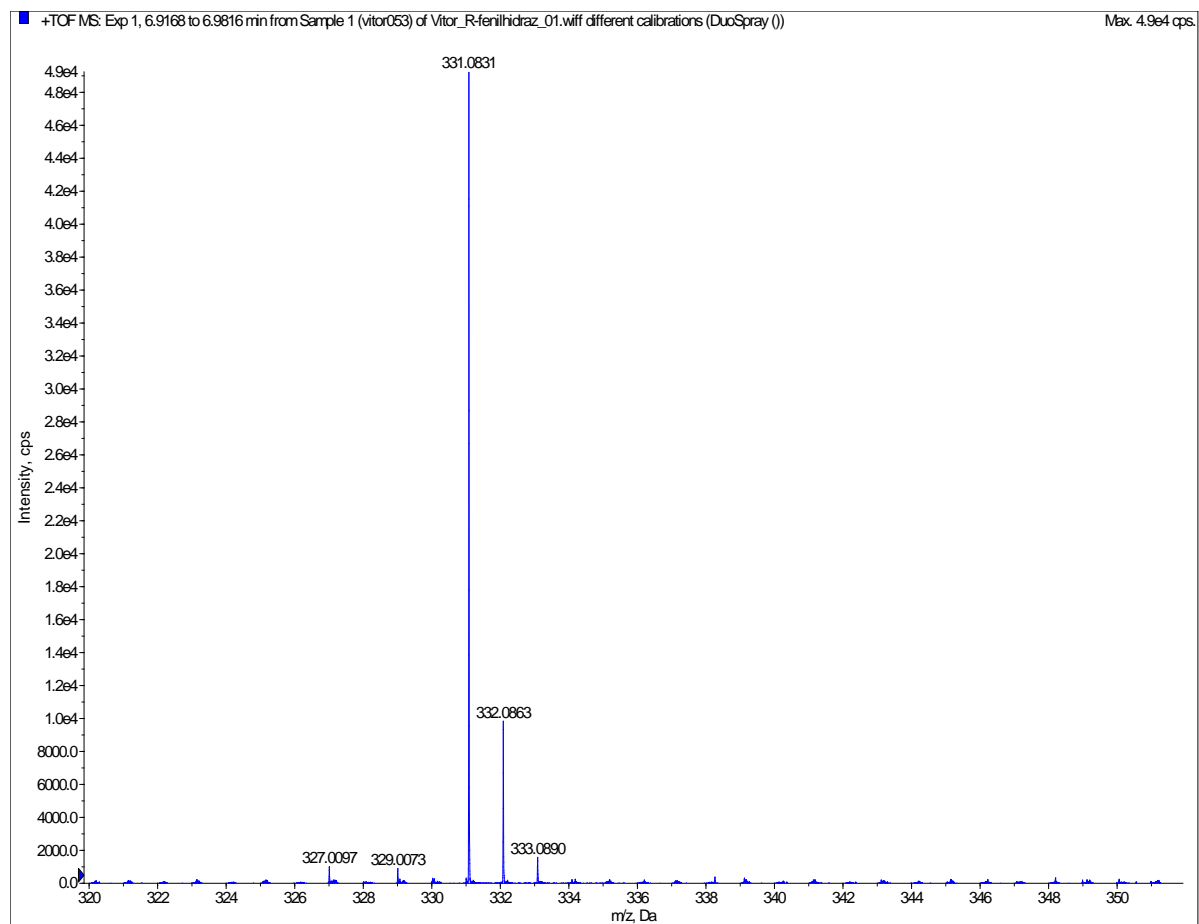

**Figure S11. HRMS ESI+ spectra obtained in positive mode for 3,5,8-TMON (2). The molecular formula  $C_{17}H_{14}O_7$  corresponds to the exact calculated mass of 330.0740 u for the deprotonated molecule, with a 3.9385 ppm error compared to the spectra.**

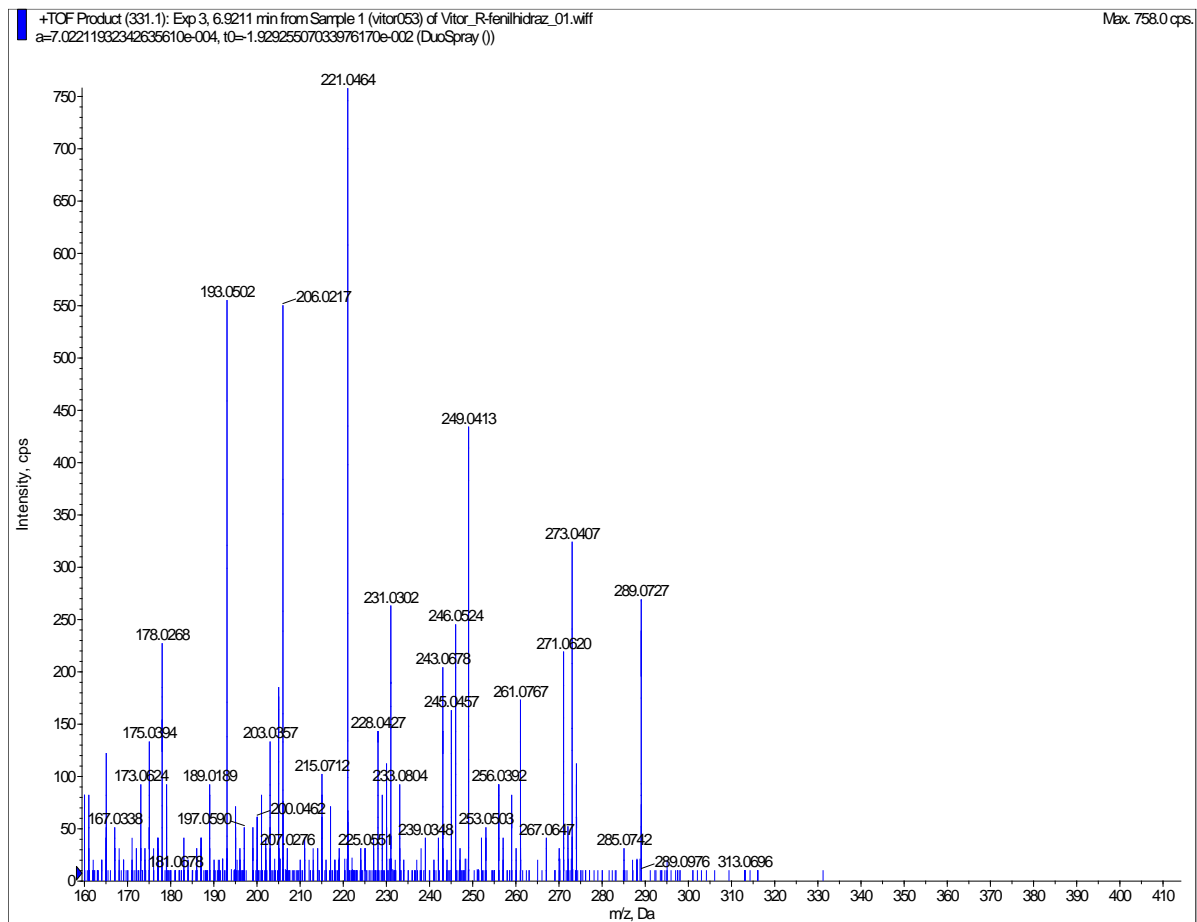

Figure S12. ESI+ CID spectra (30eV, N<sub>2</sub>) of 3,5,8-TMON (2).

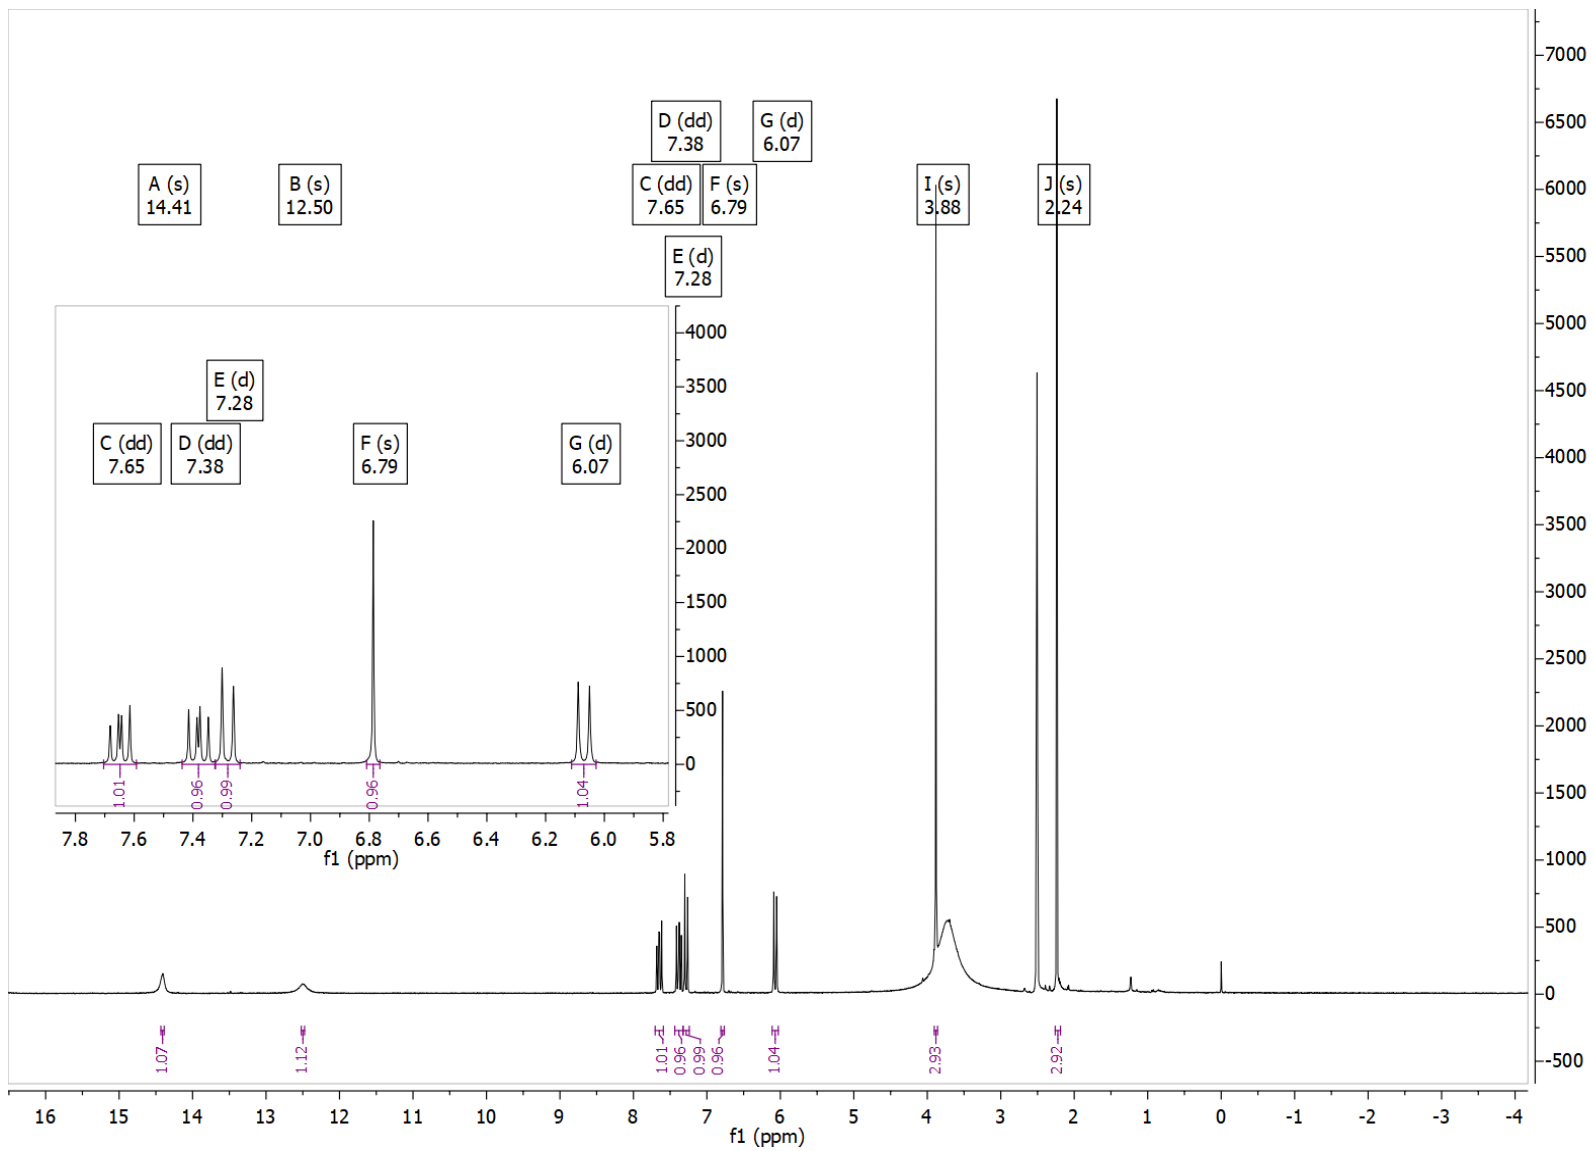

Figure S12. <sup>1</sup>H NMR spectra of 3,5,8-TMON in DMSO-d<sub>6</sub>, 400 MHz.

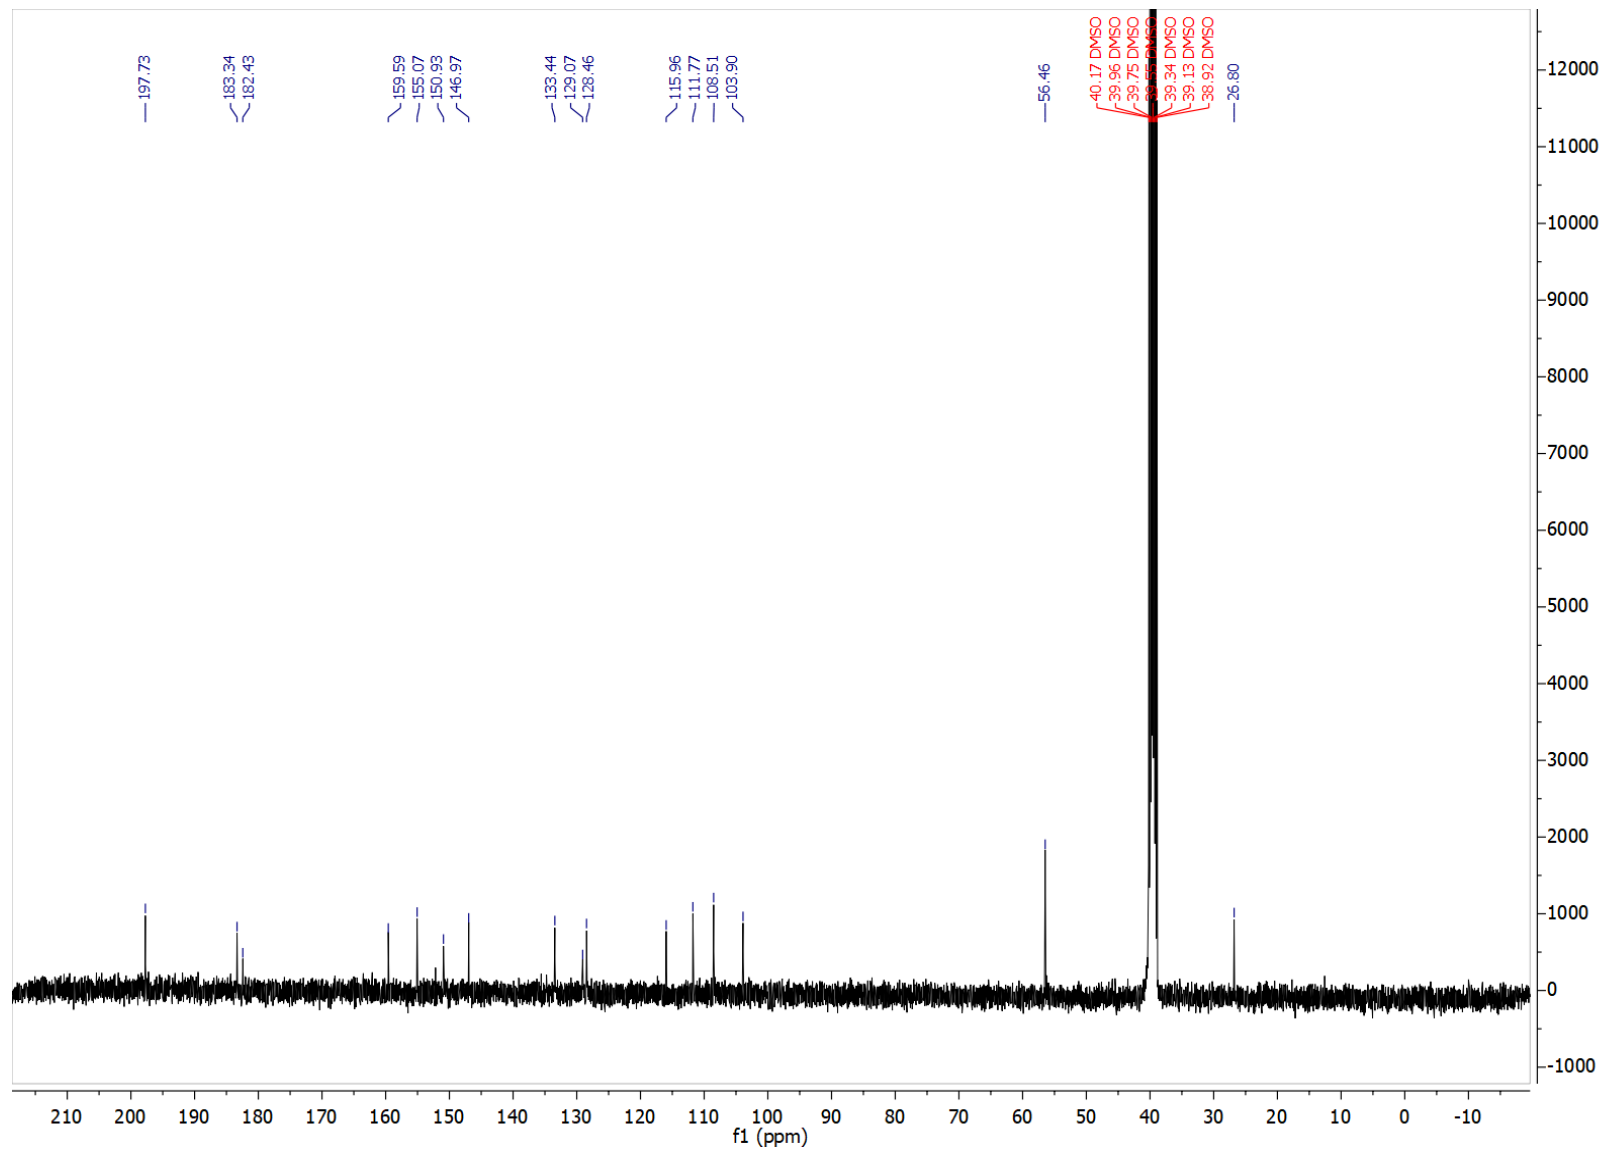

Figure S13.  $^{13}\text{C}$  NMR spectra of 3,5,8-TMON in DMSO- $d_6$ , 100 MHz

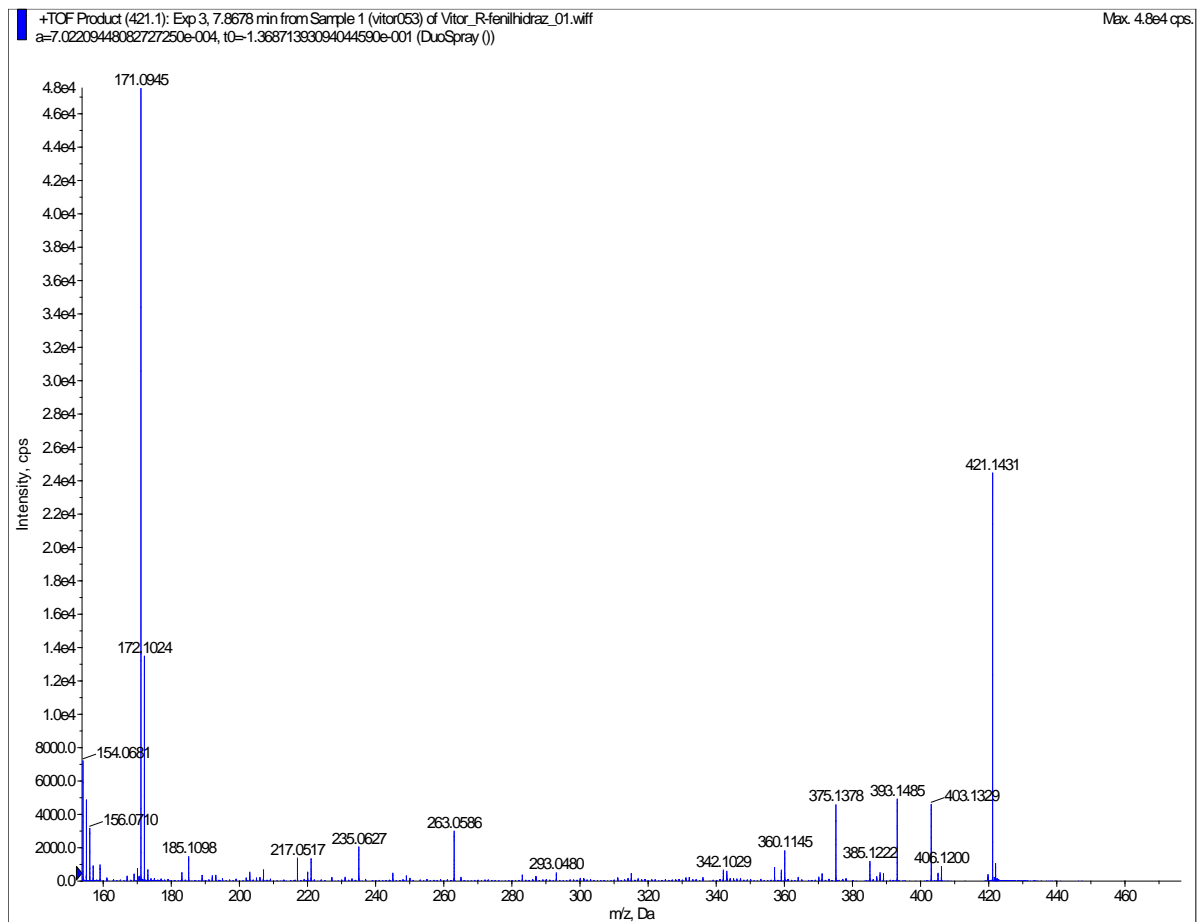

Figure S14. ESI+ CID spectra (30eV, N<sub>2</sub>) of 3.



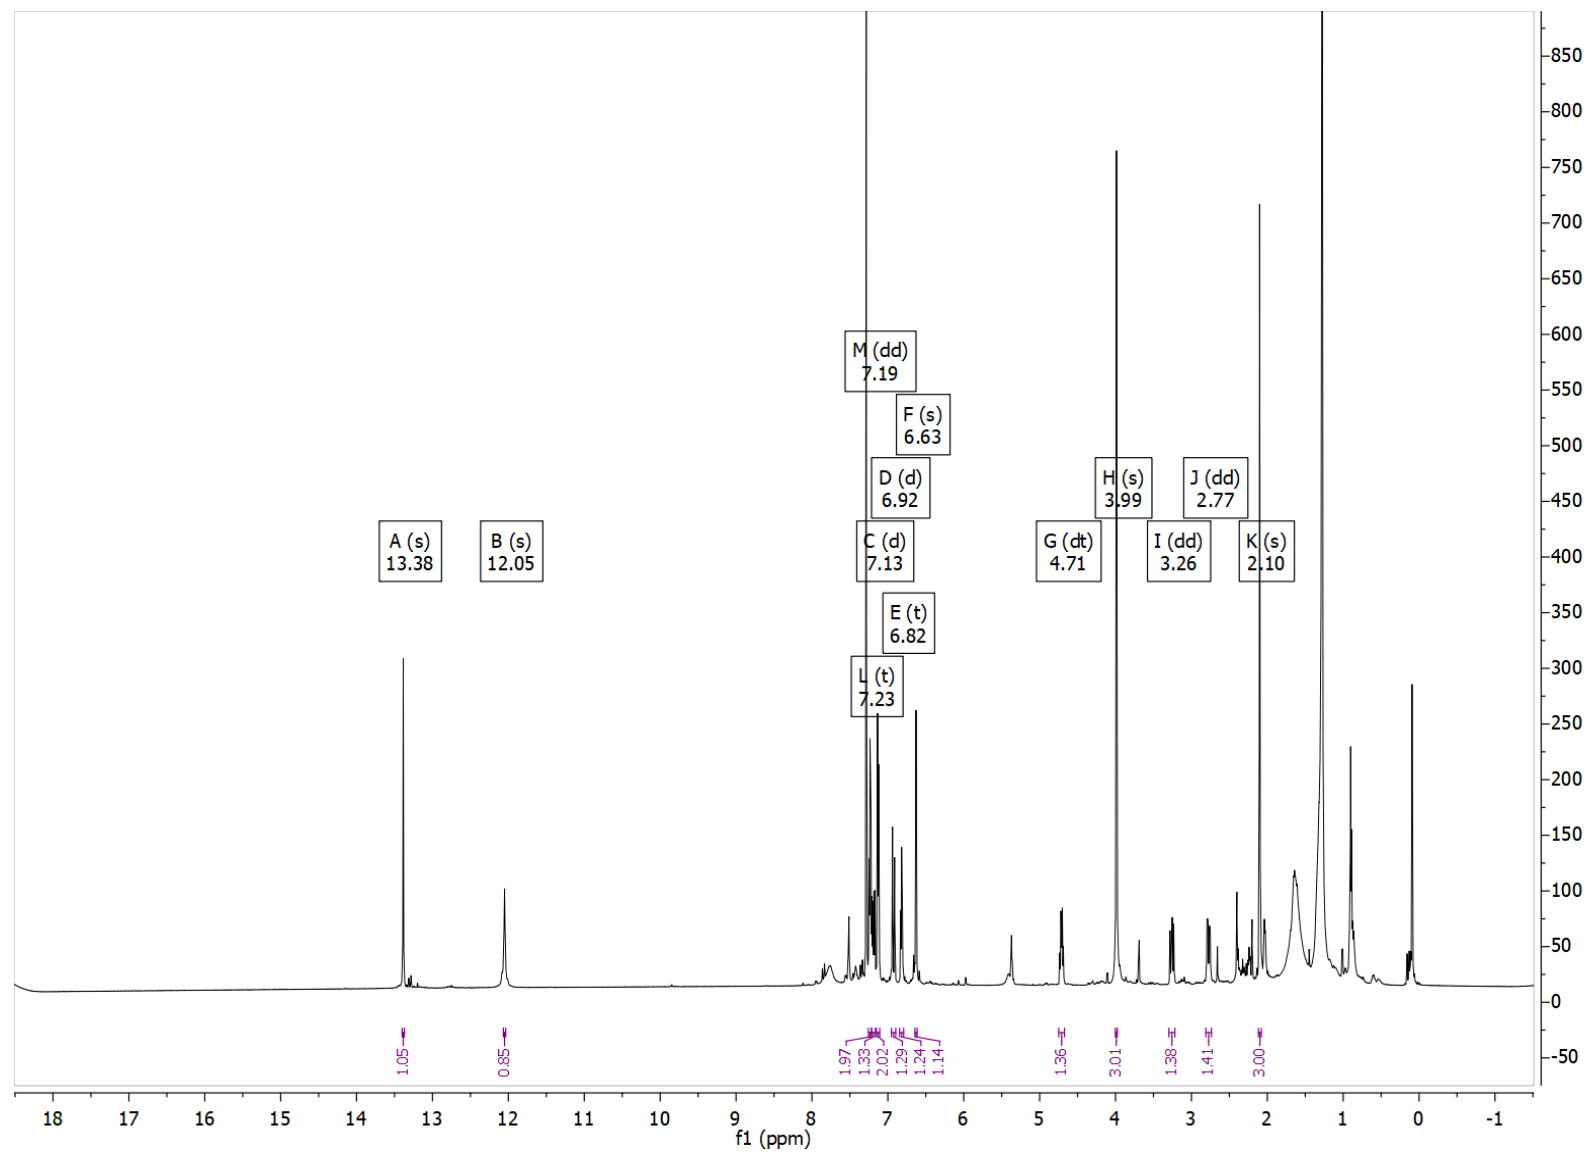

Figure S15.  $^1\text{H}$  NMR spectra of **3** in  $\text{CDCl}_3$ , 600 MHz.

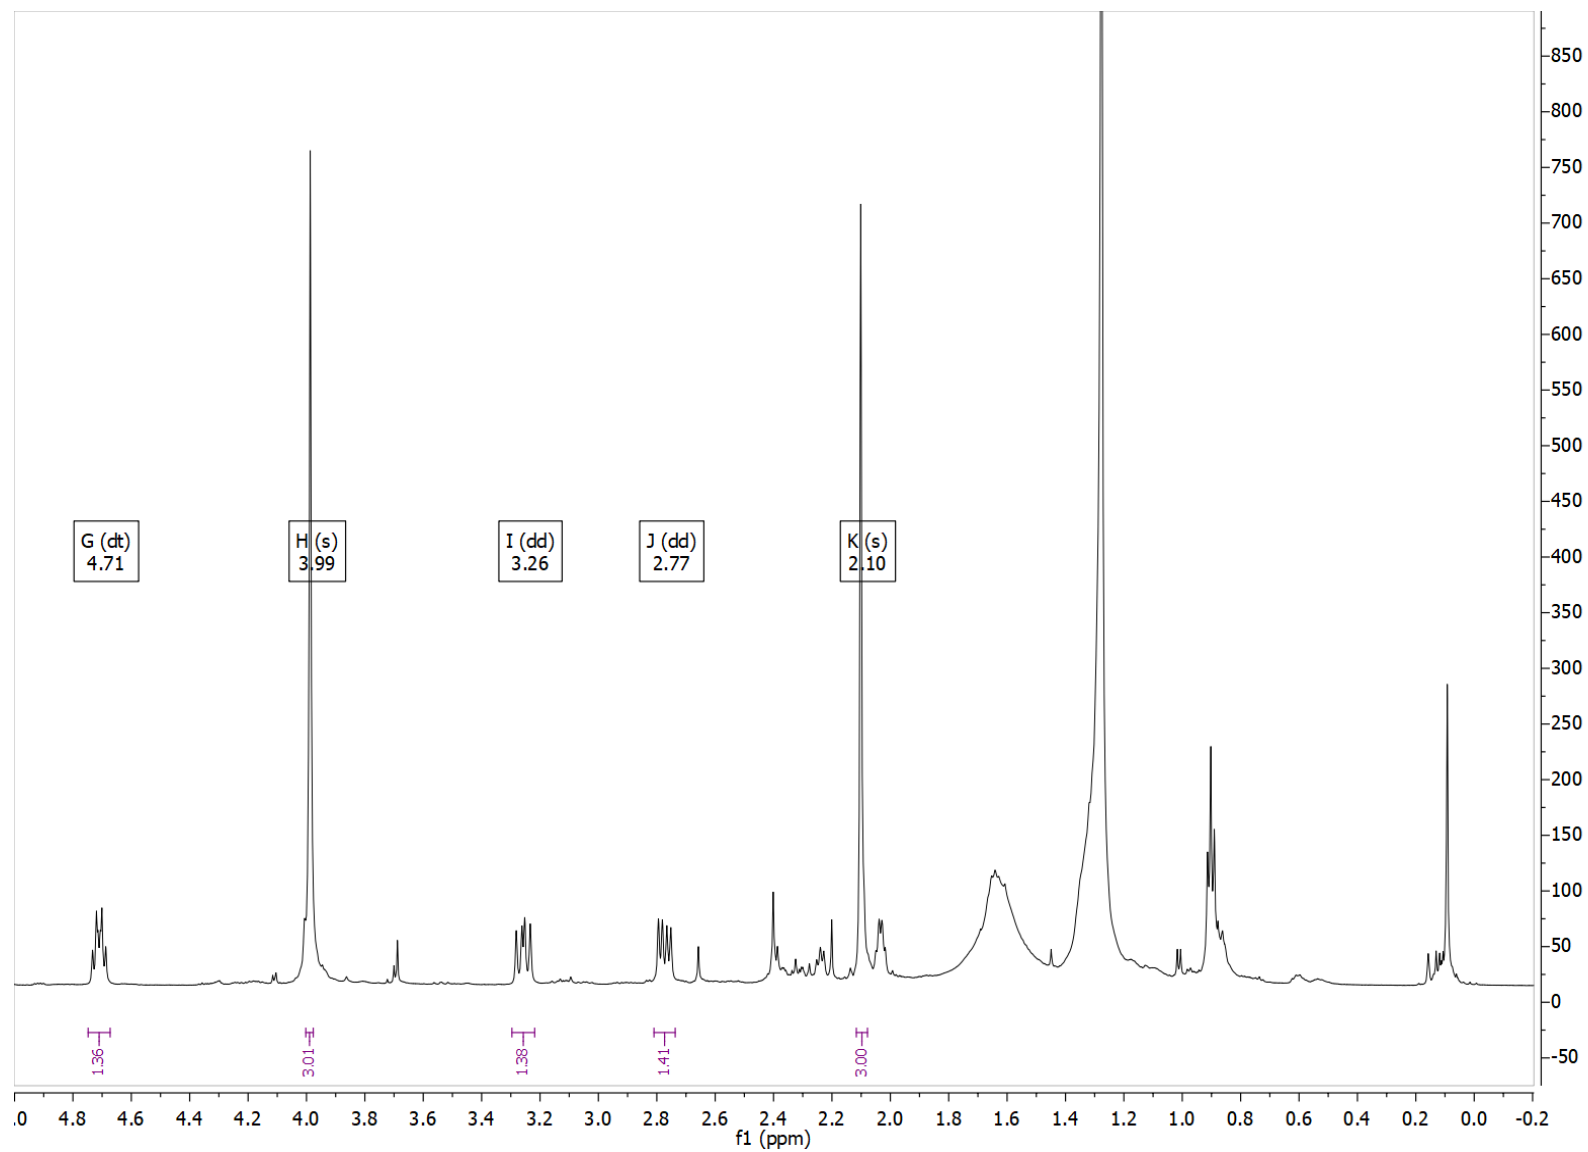

Figure S16. <sup>1</sup>H NMR spectra of 3 from 0 to 5 ppm in CDCl<sub>3</sub>, 600 MHz.

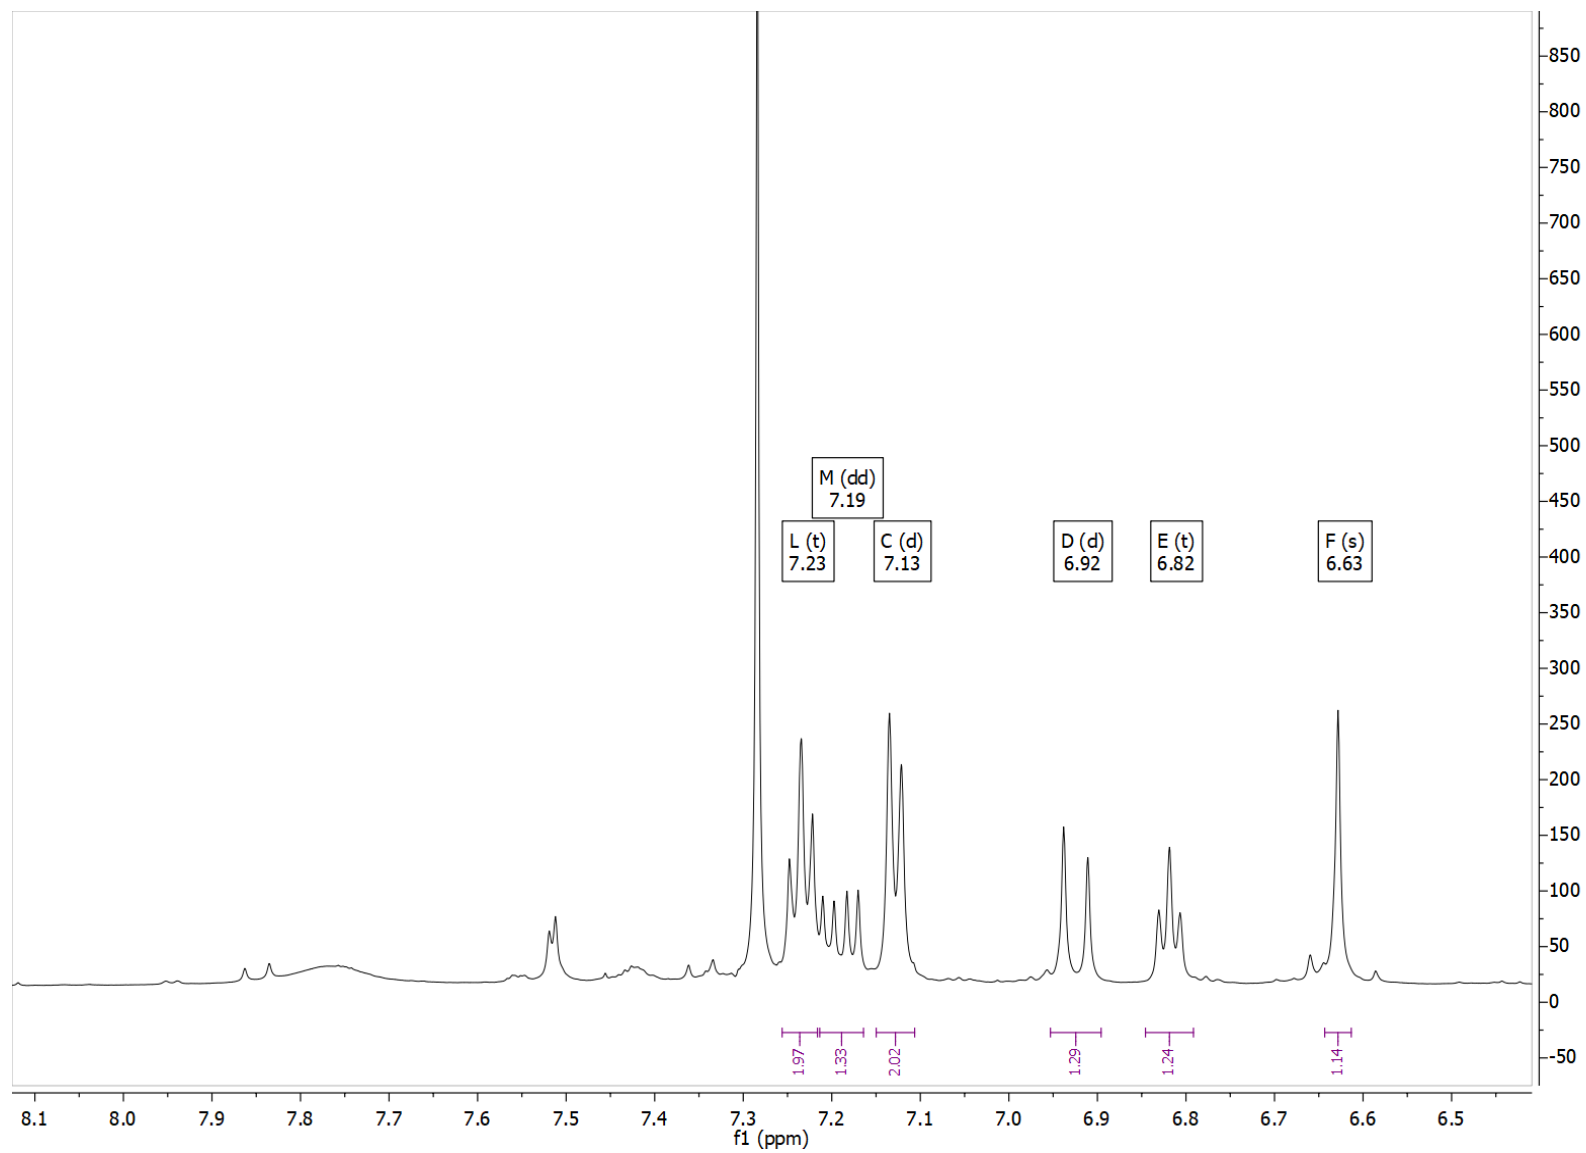

Figure S17. <sup>1</sup>H NMR spectra of 3 from 6.5 to 8.0 ppm in CDCl<sub>3</sub>, 600 MHz.

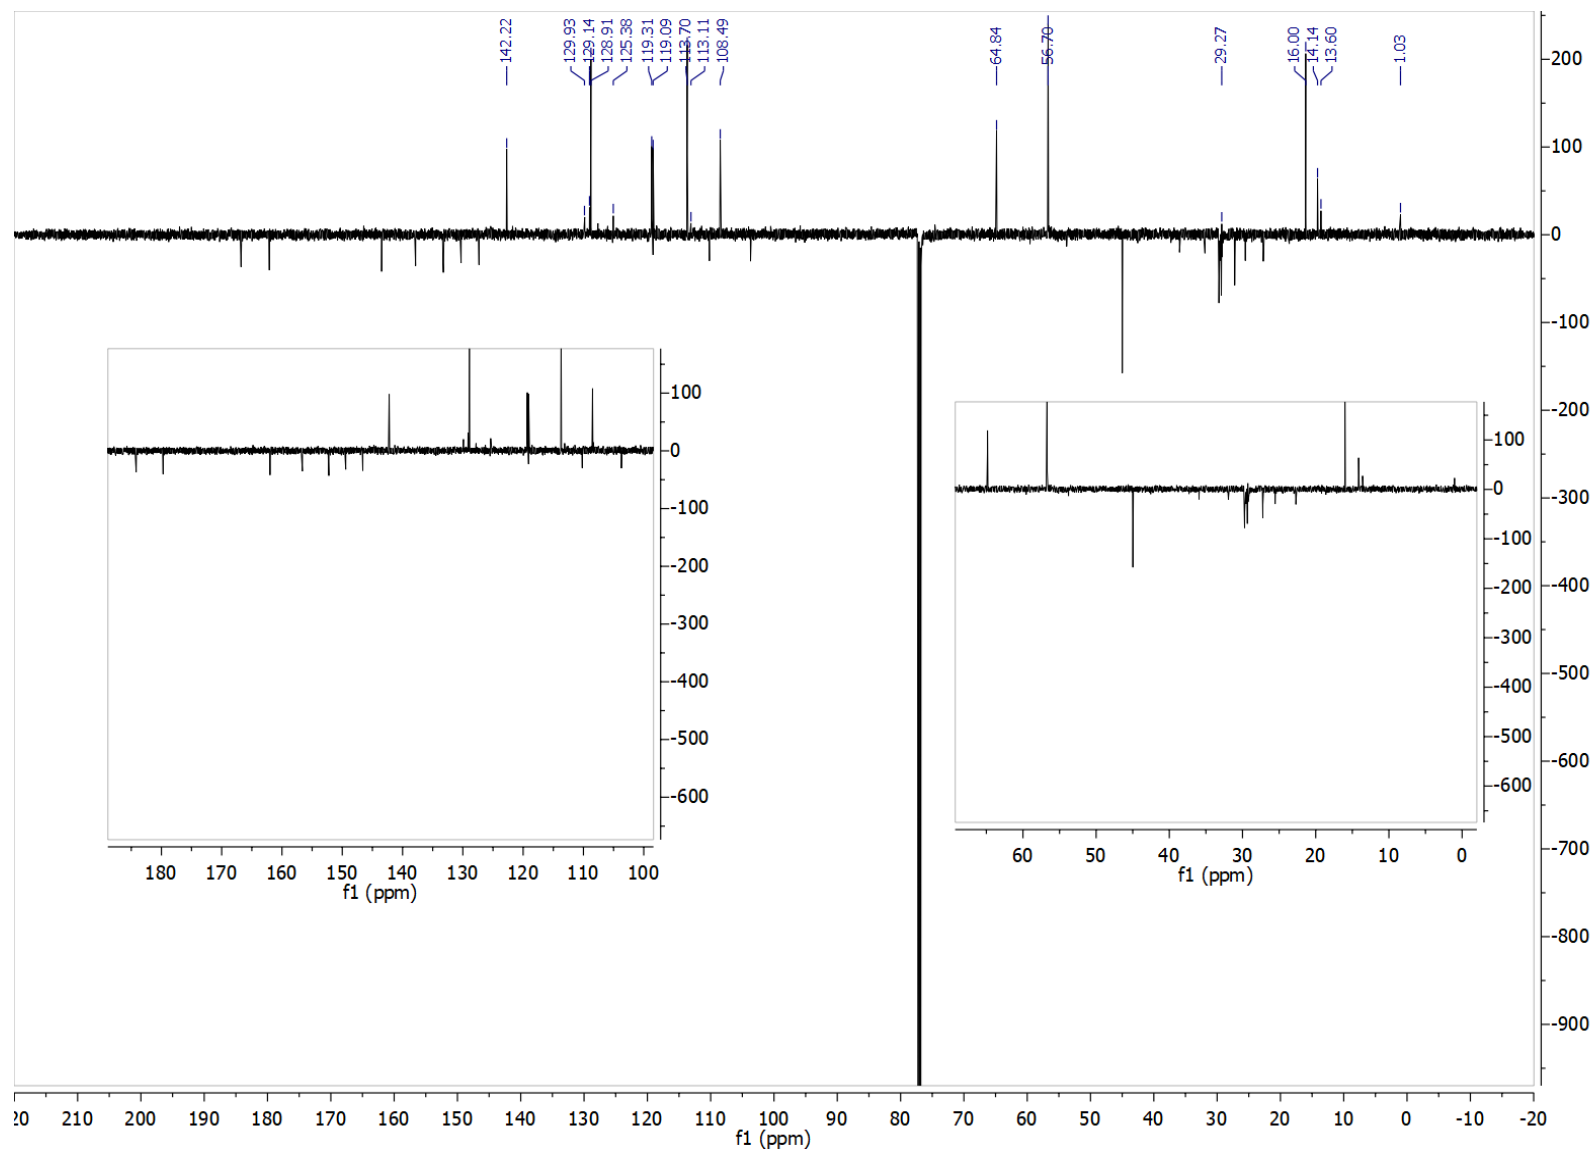

Figure S18.  $^{13}\text{C}$  APT NMR spectra of 3 in  $\text{CDCl}_3$ , 150 MHz.

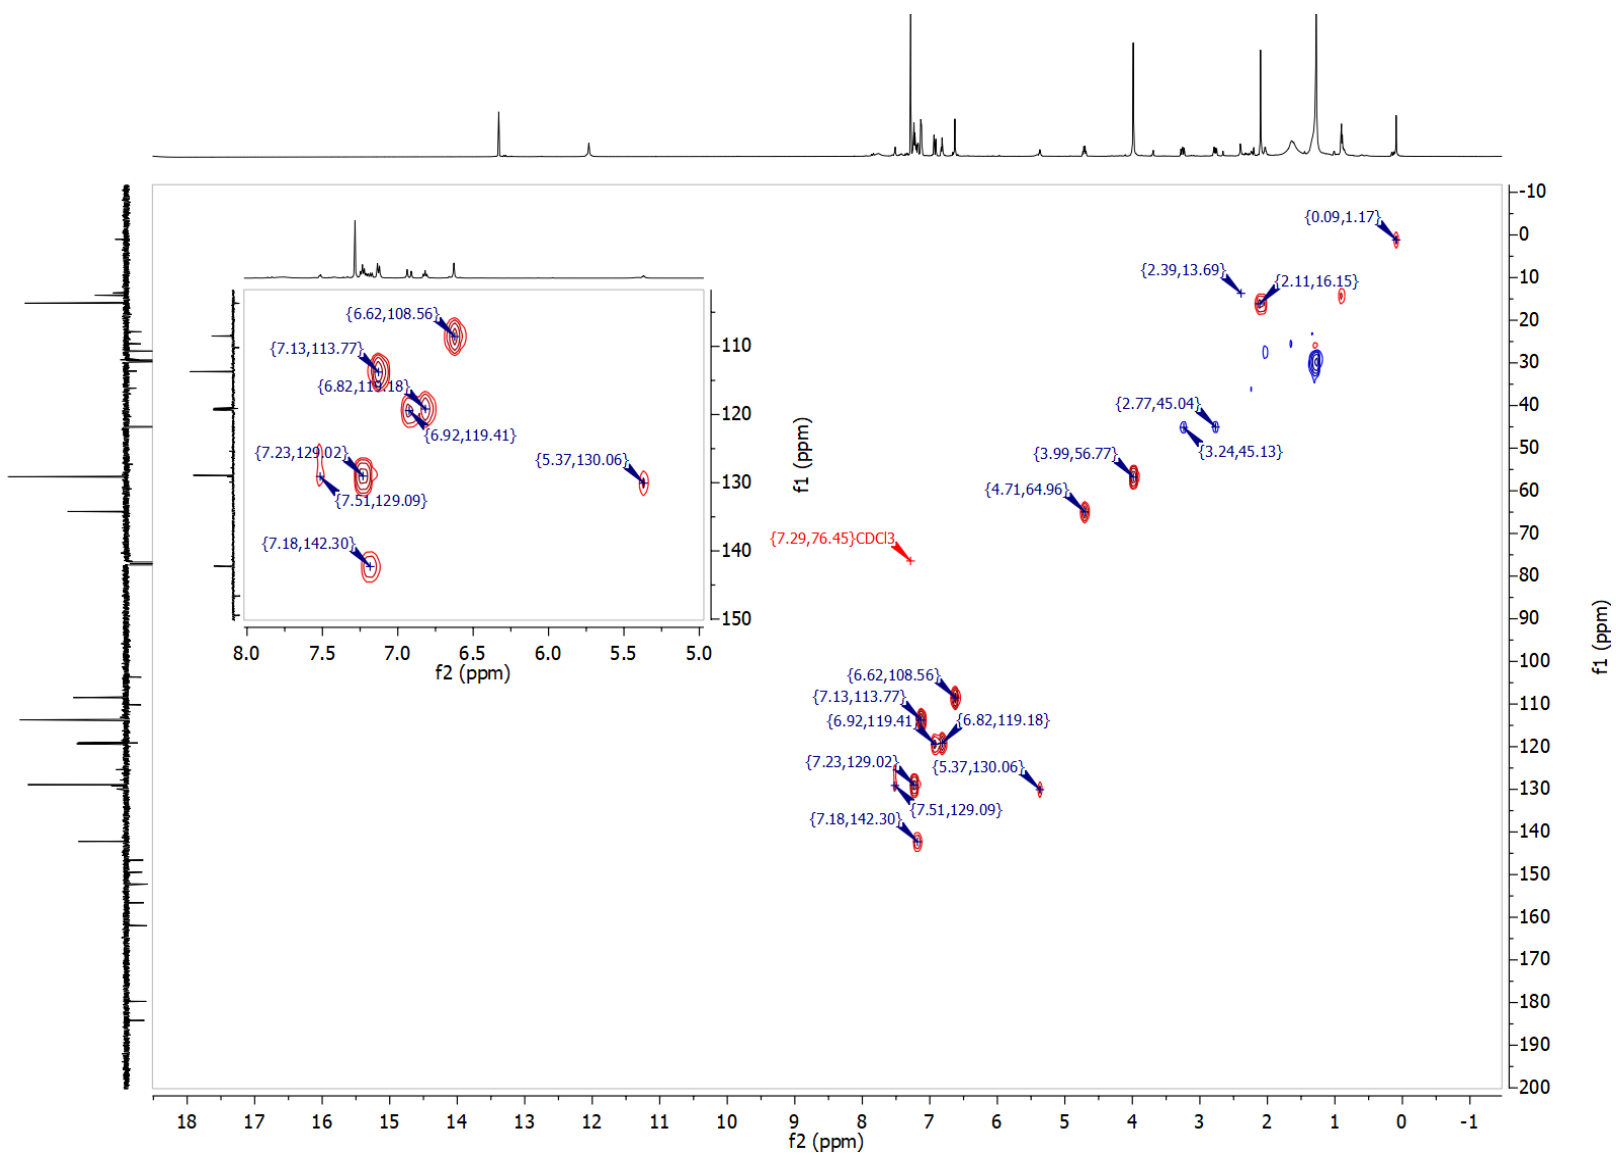

Figure S20. HMQC map for 3 in CDCl<sub>3</sub>.

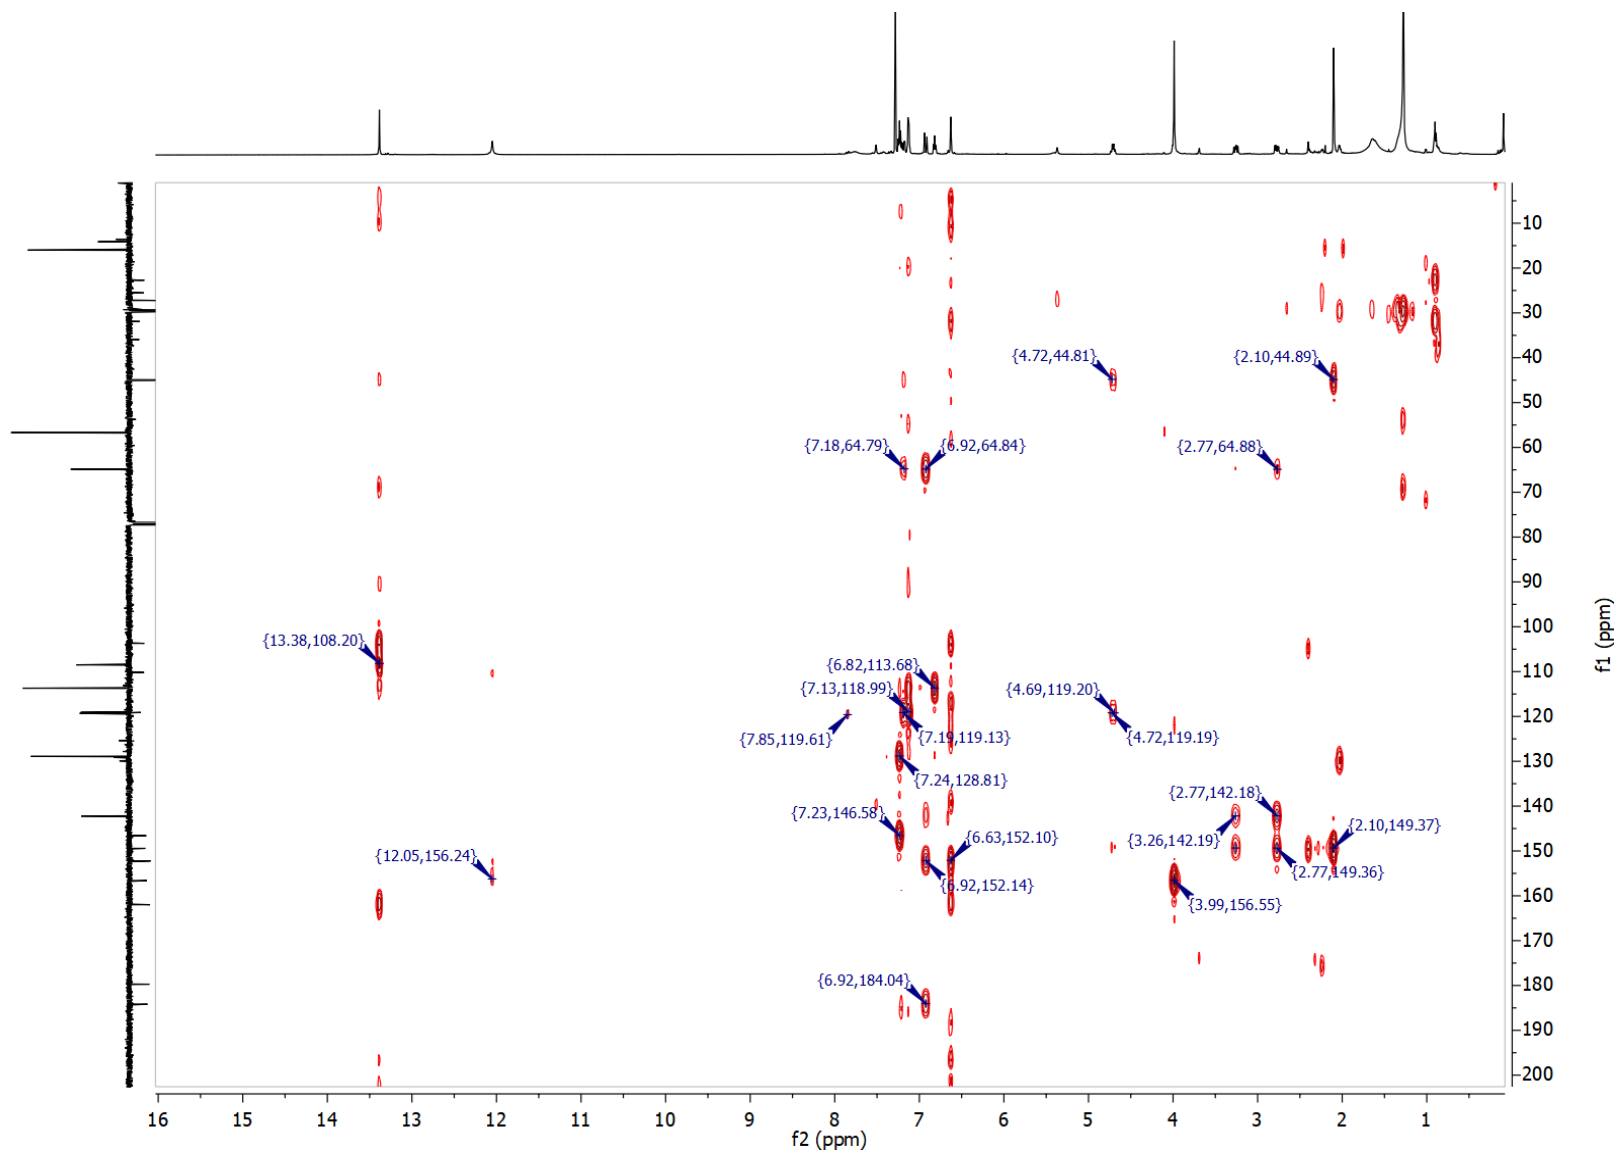

Figure S29. HMBC map for 3 in  $\text{CDCl}_3$ .

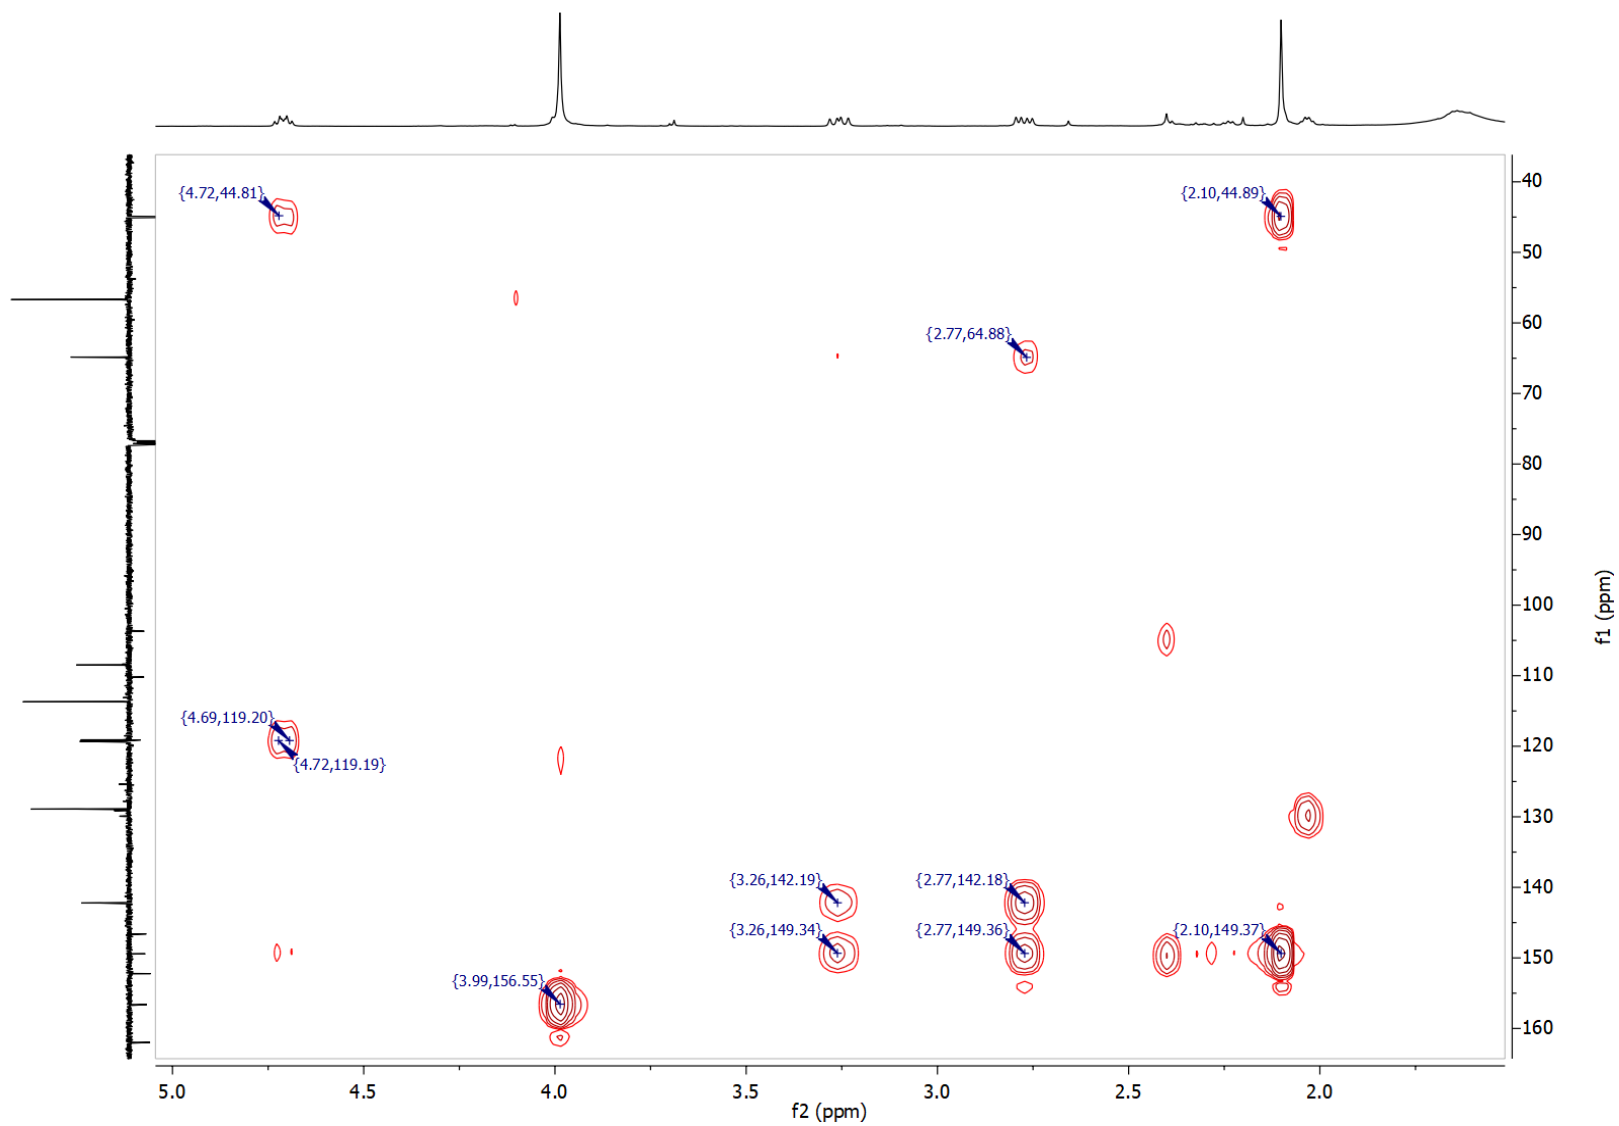

Figure S210. HMBC map for 3 from 1.0 to 5.0 ppm in CDCl<sub>3</sub>.

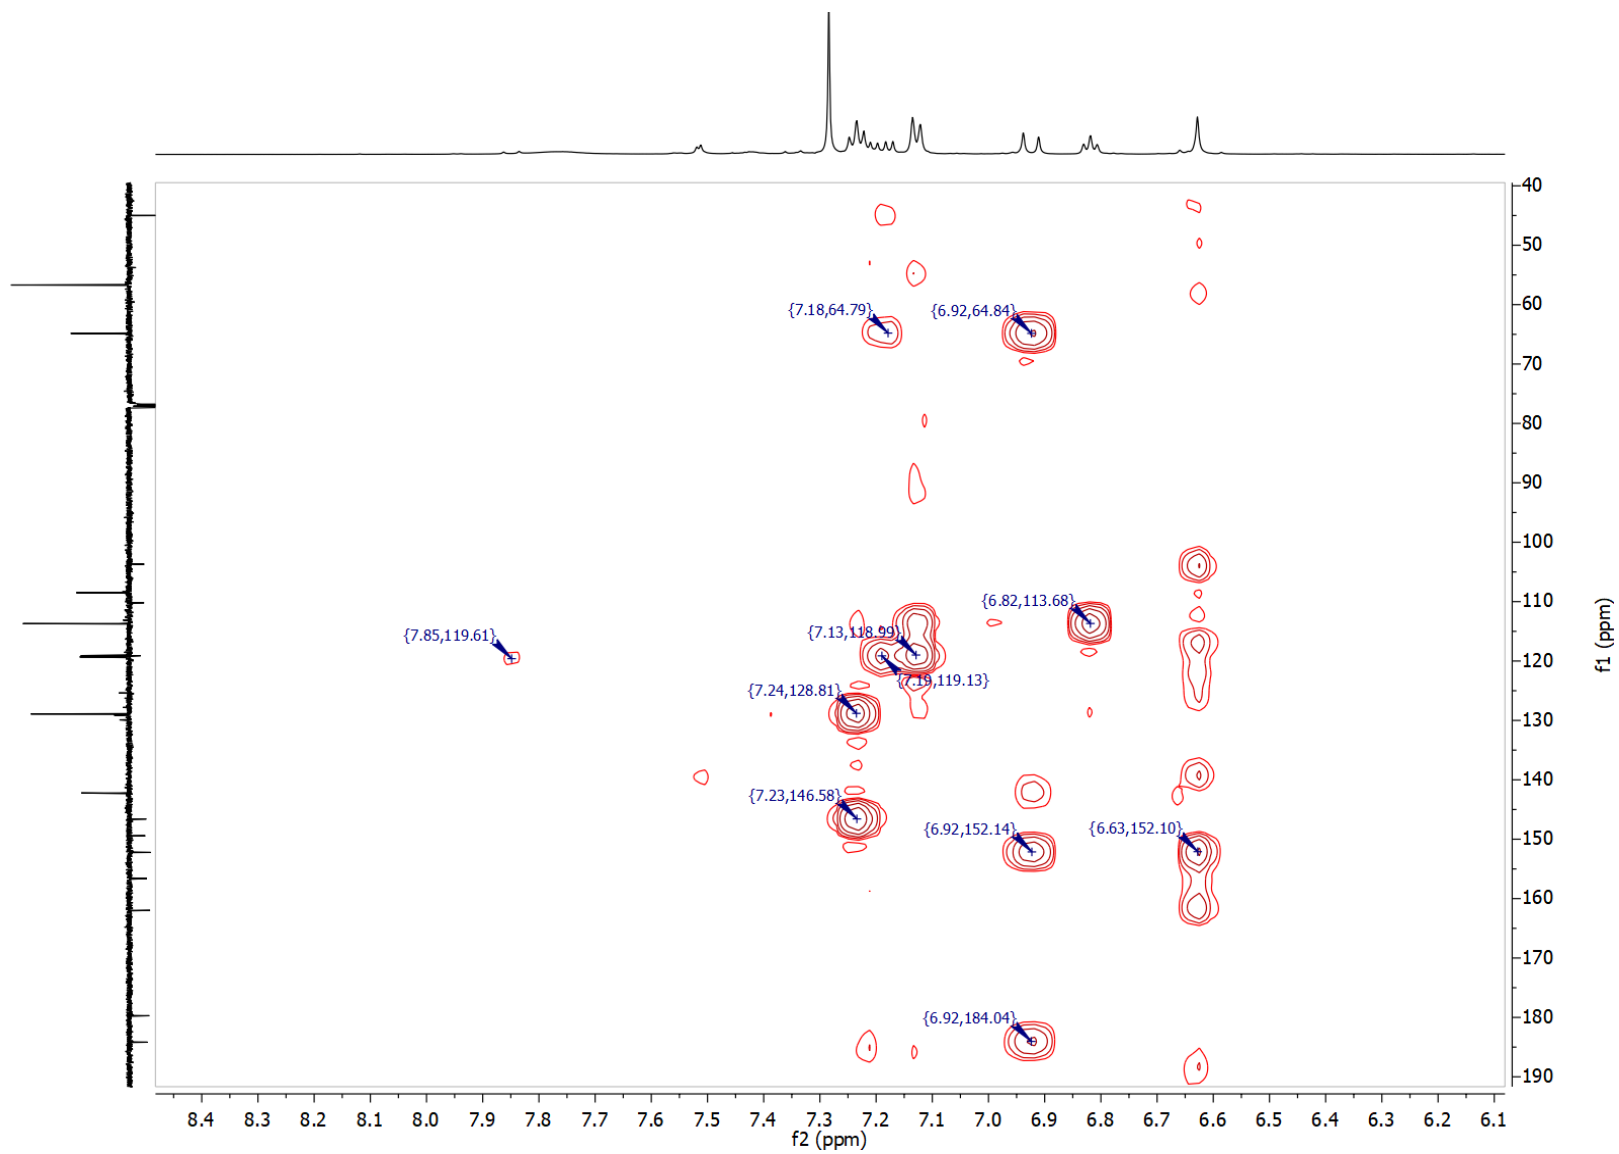

Figure S11. HMBC map for 3 from 6.0 to 8.5 ppm in CDCl<sub>3</sub>.



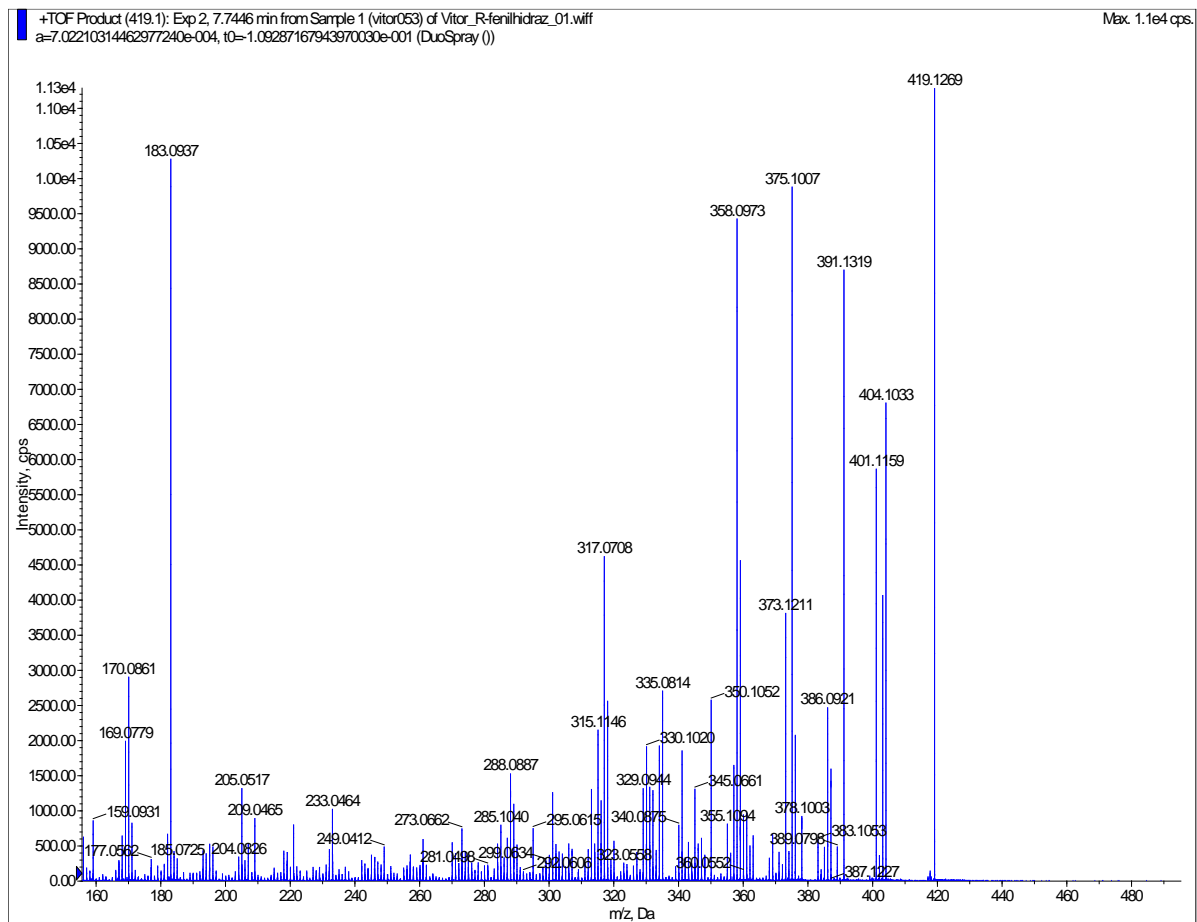

Figure S12. ESI+ CID spectra (30eV, N<sub>2</sub>) of 4.

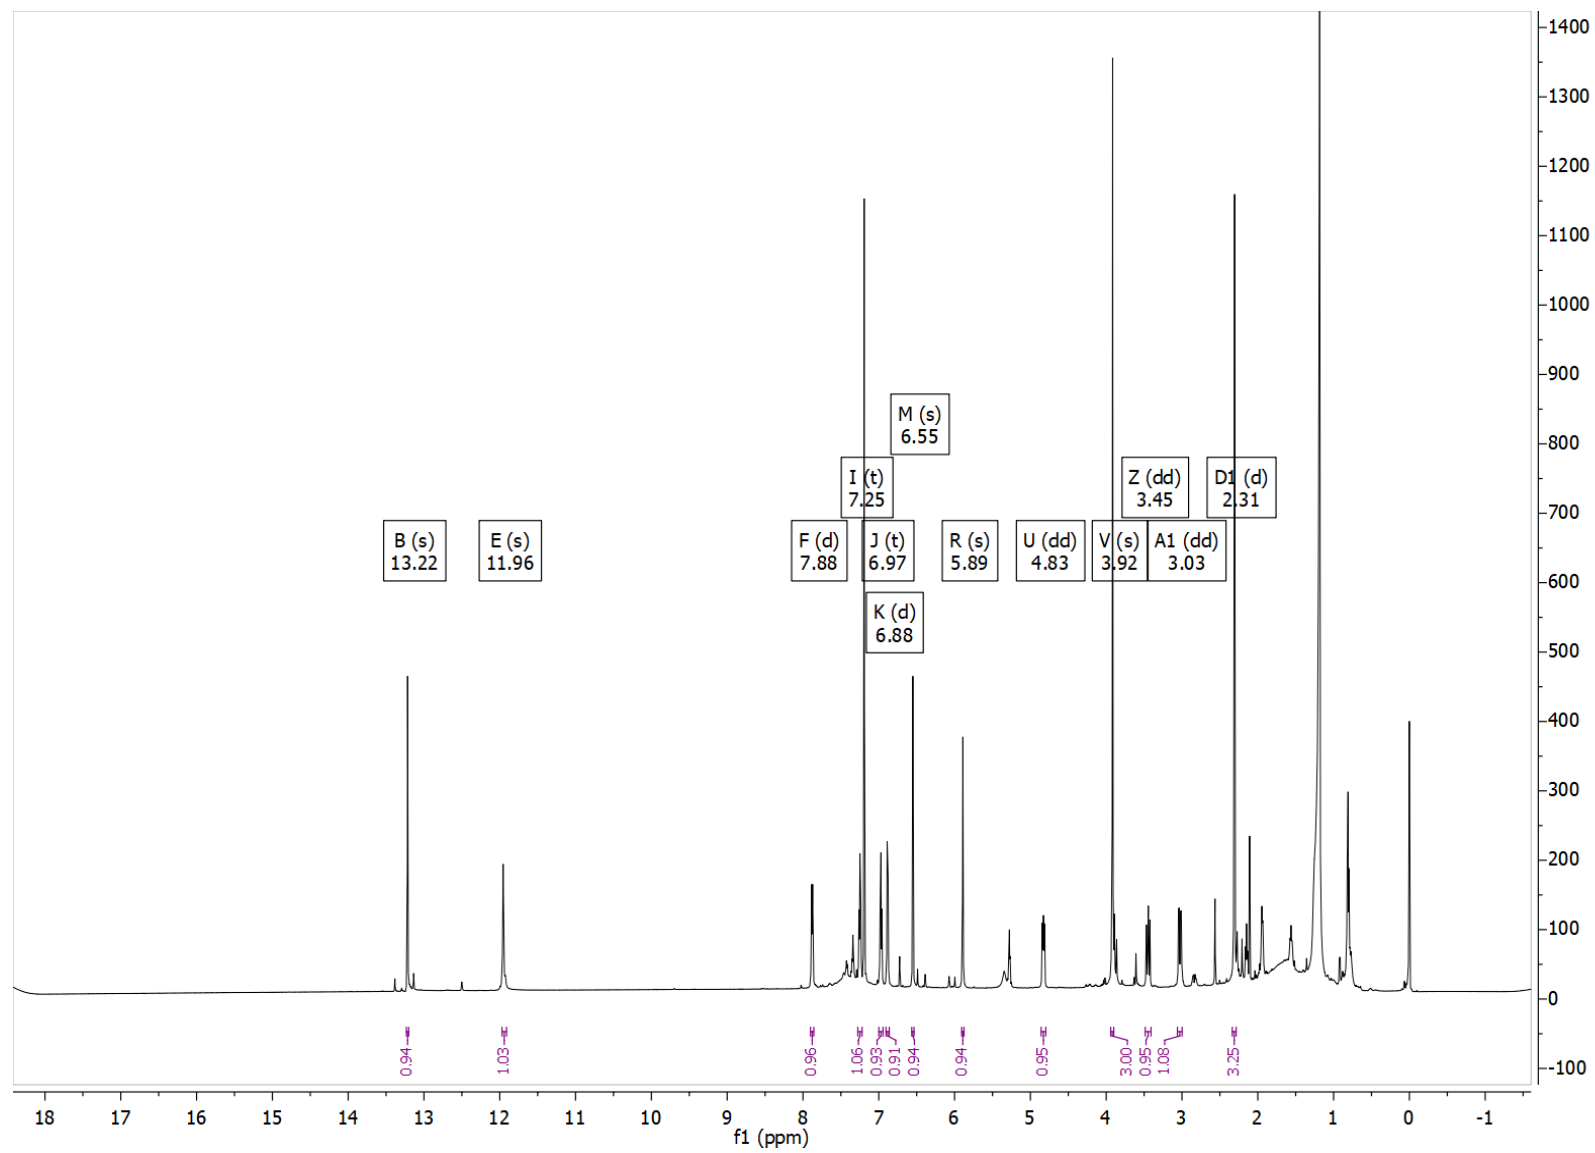

Figure S13. <sup>1</sup>H NMR spectra of 4 in CDCl<sub>3</sub>, 600 MHz.

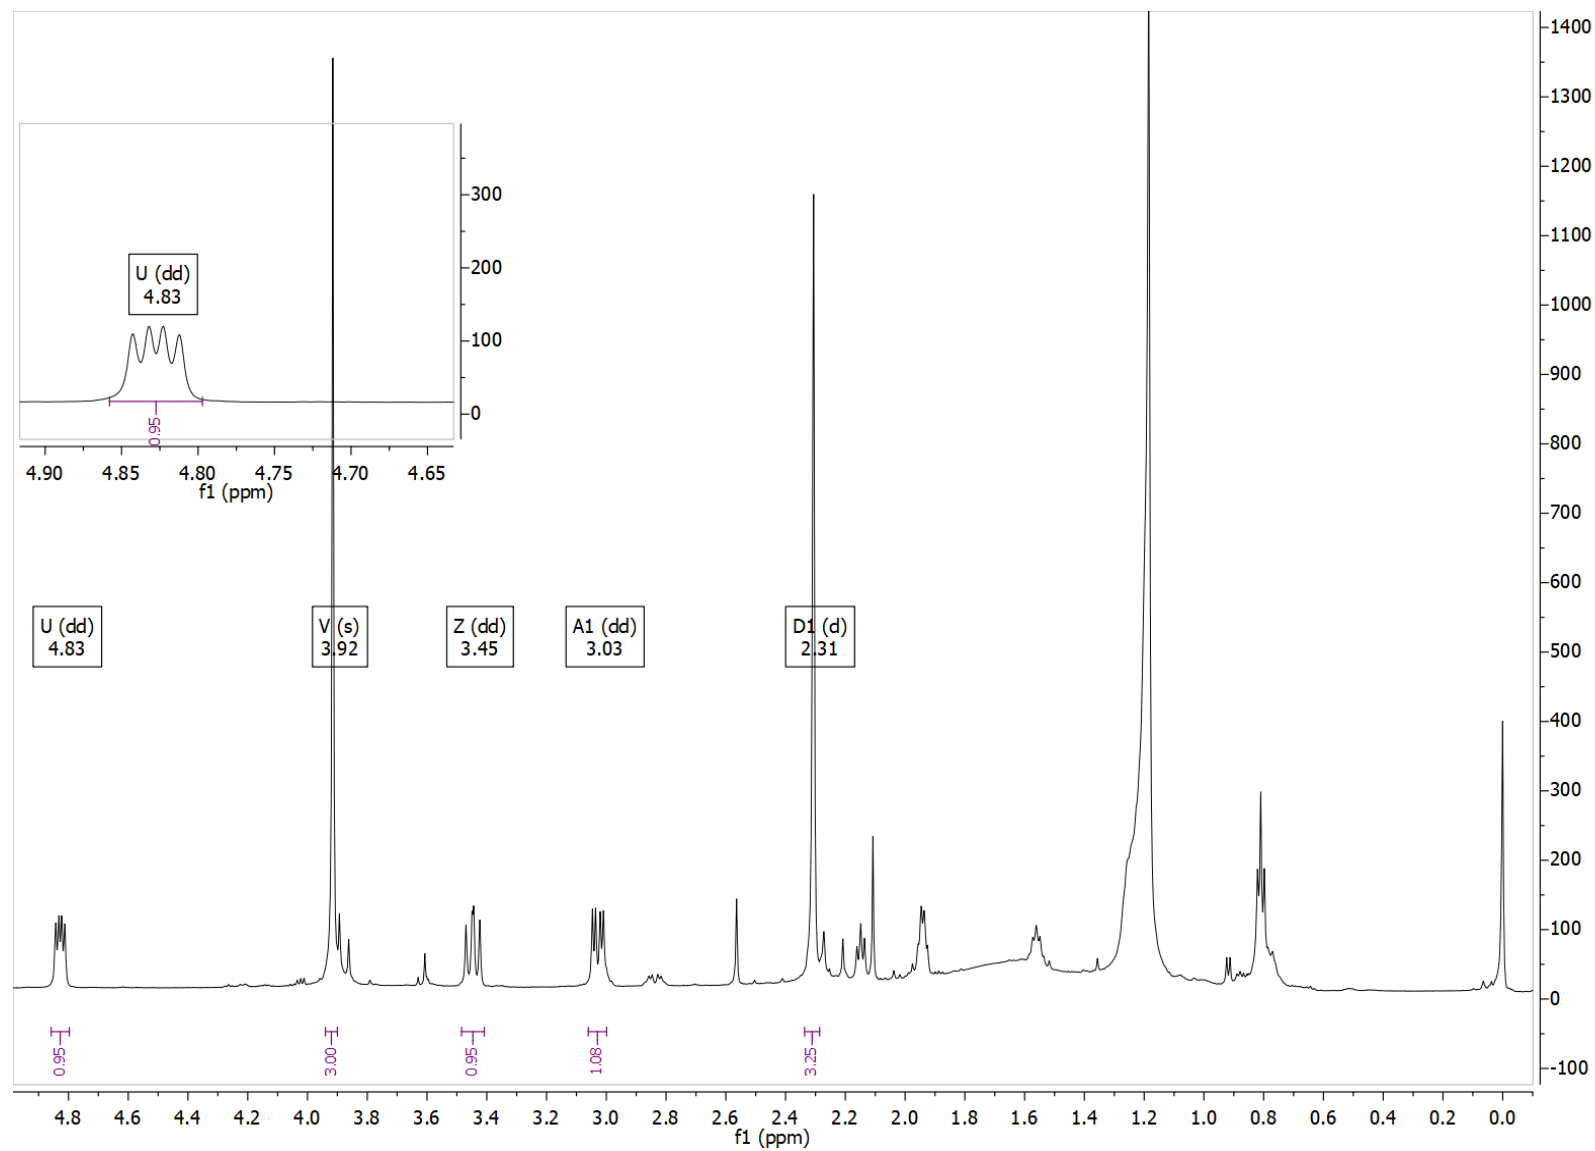

Figure S14. <sup>1</sup>H NMR spectra of 4 from 0 to 5 ppm in CDCl<sub>3</sub>, 600 MHz.

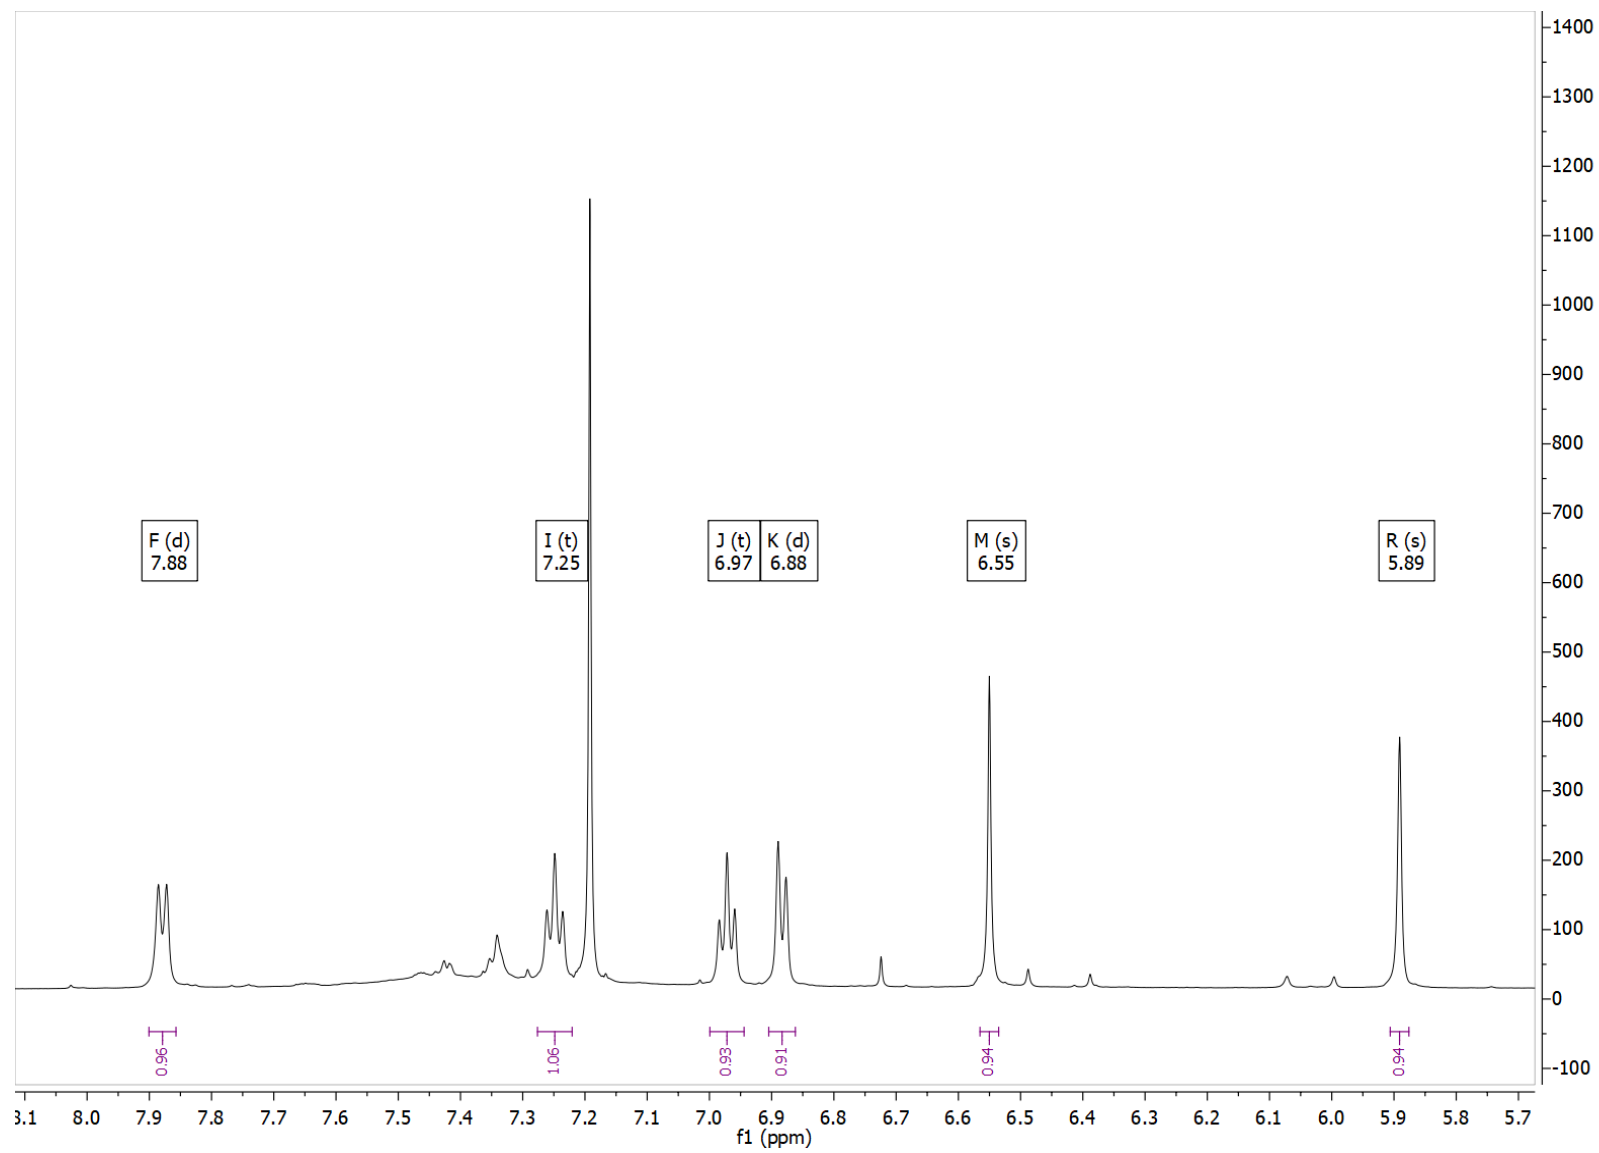

Figure S15. <sup>1</sup>H NMR spectra of 4 from 5.5 to 8.0 ppm in CDCl<sub>3</sub>, 600 MHz.

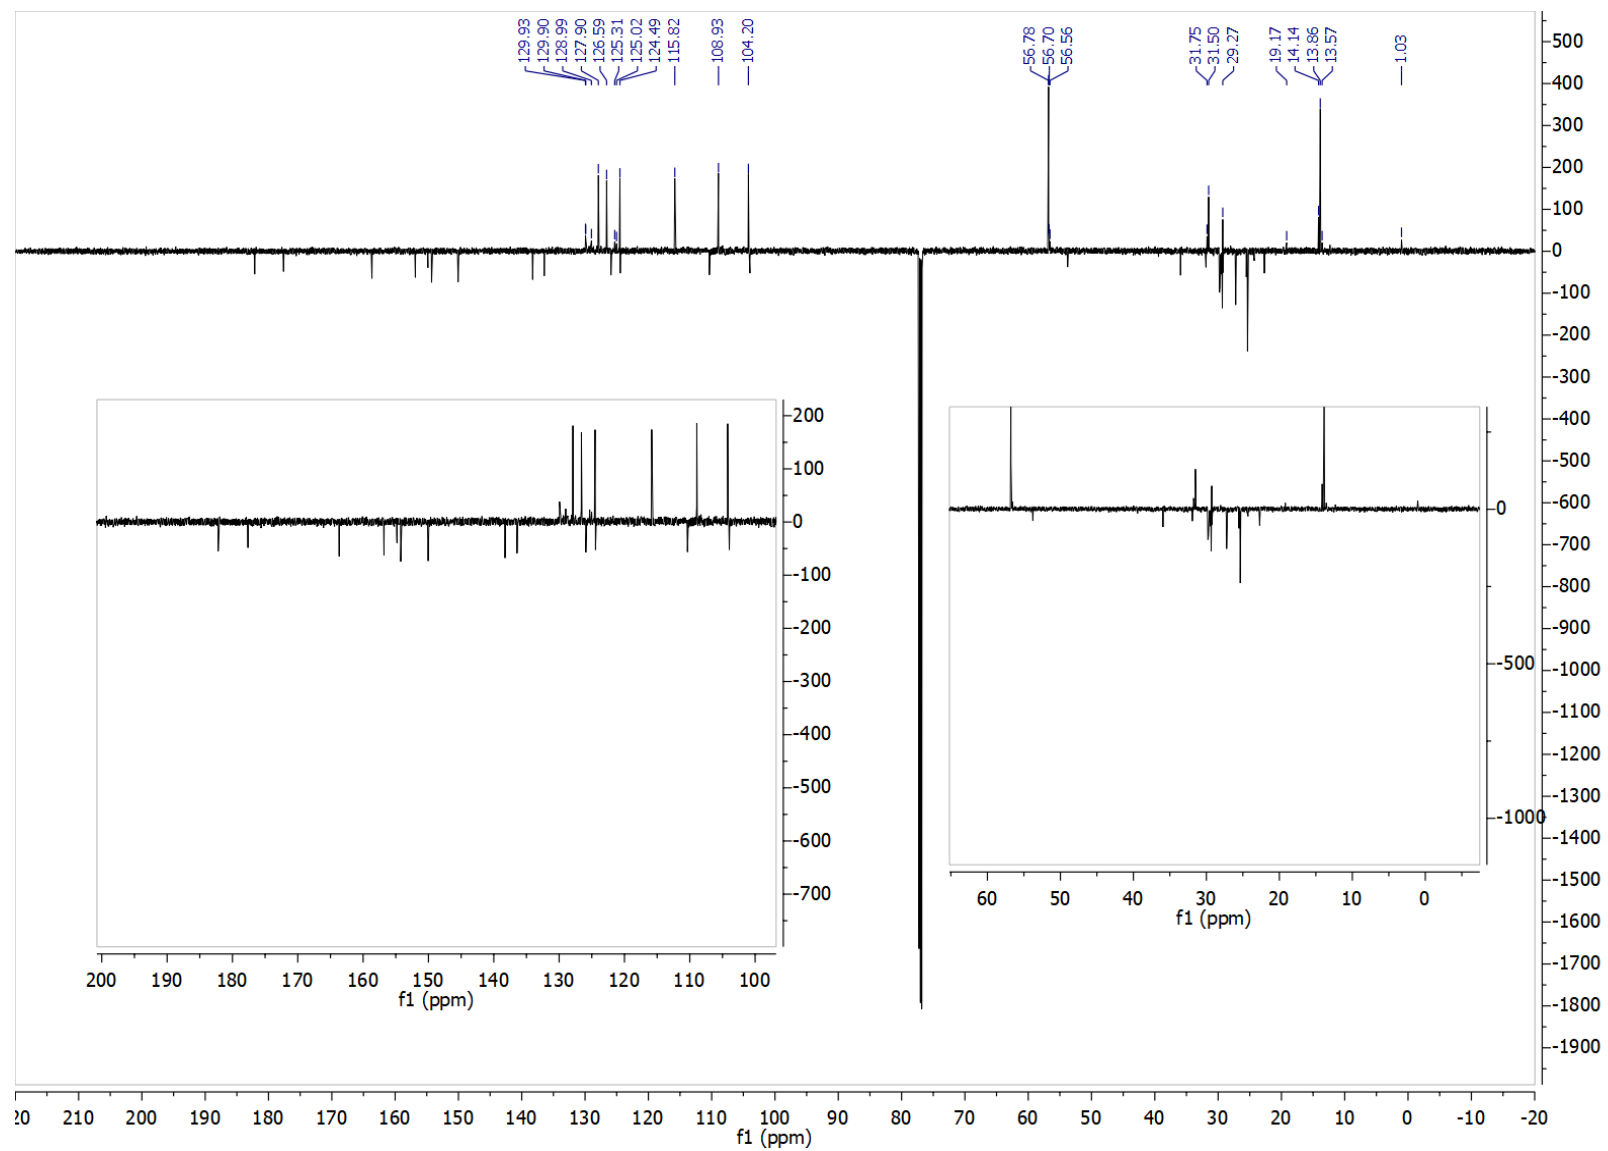

Figure S16.  $^{13}\text{C}$  APT NMR spectra for 4 in  $\text{CDCl}_3$ , 150 MHz.

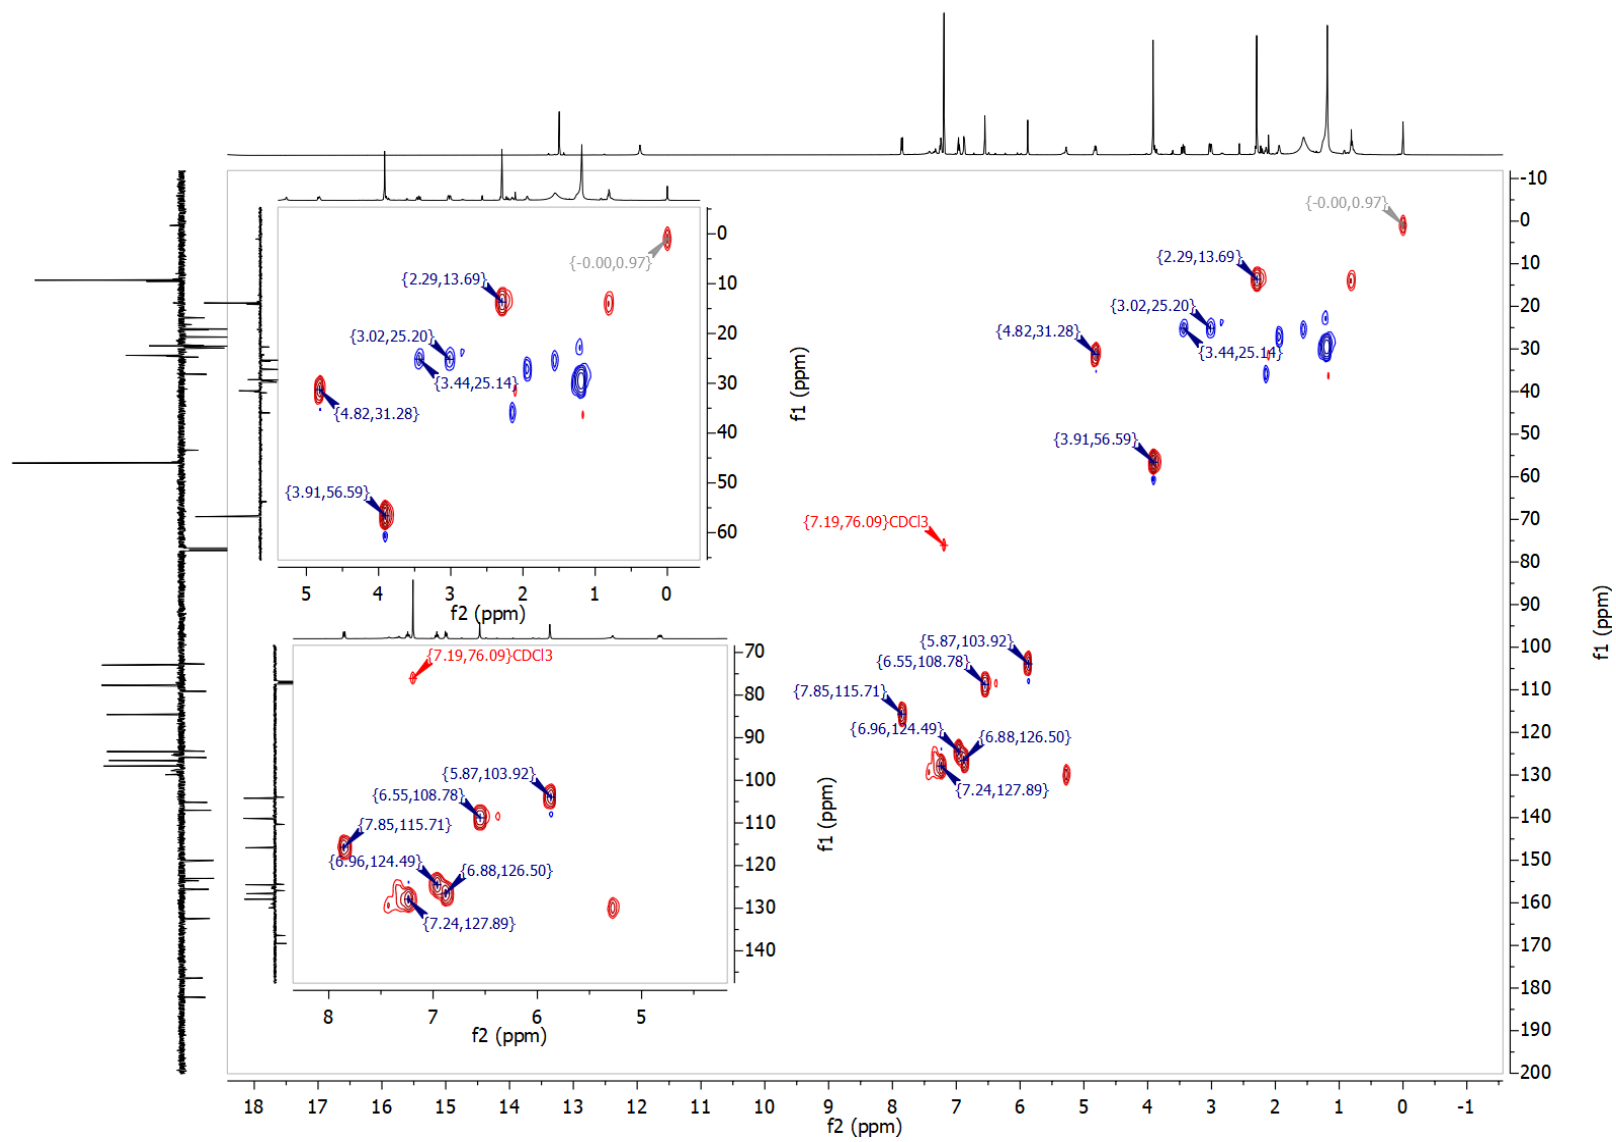

Figure S17. HMQC map for 4 in CDCl<sub>3</sub>.

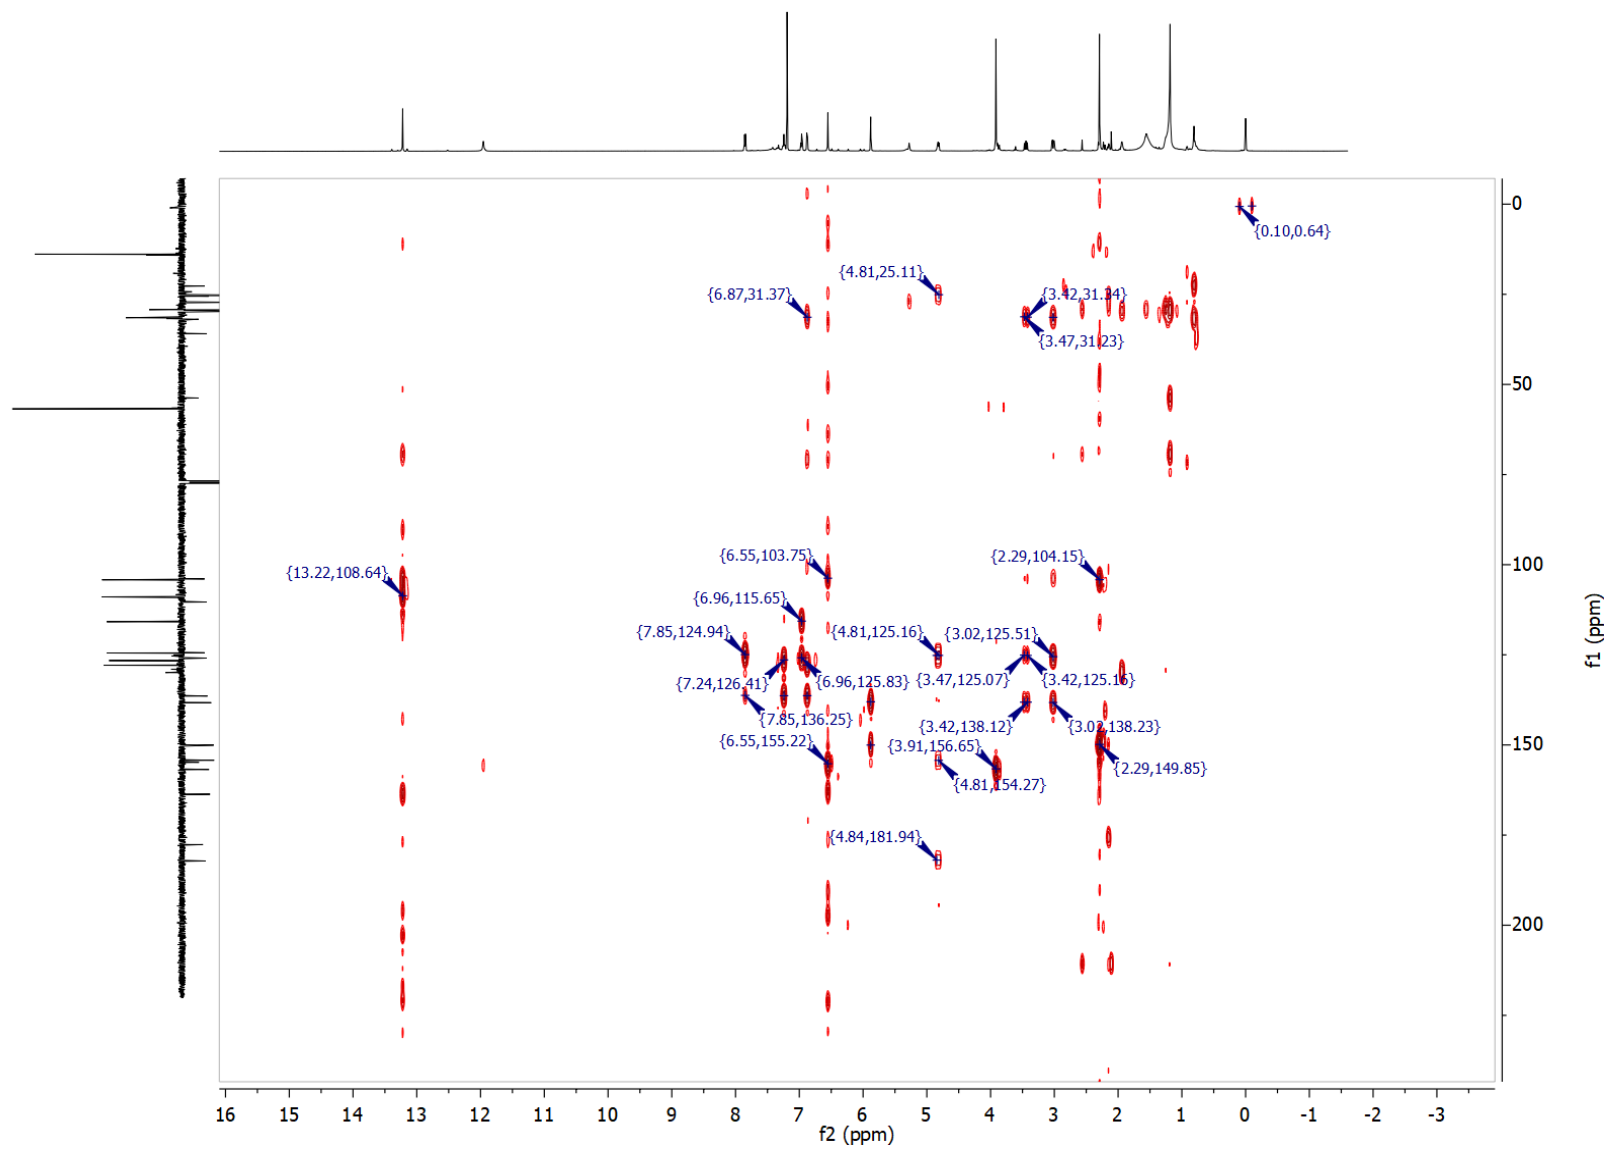

Figure S18. HMBC map for 4 in CDCl<sub>3</sub>.

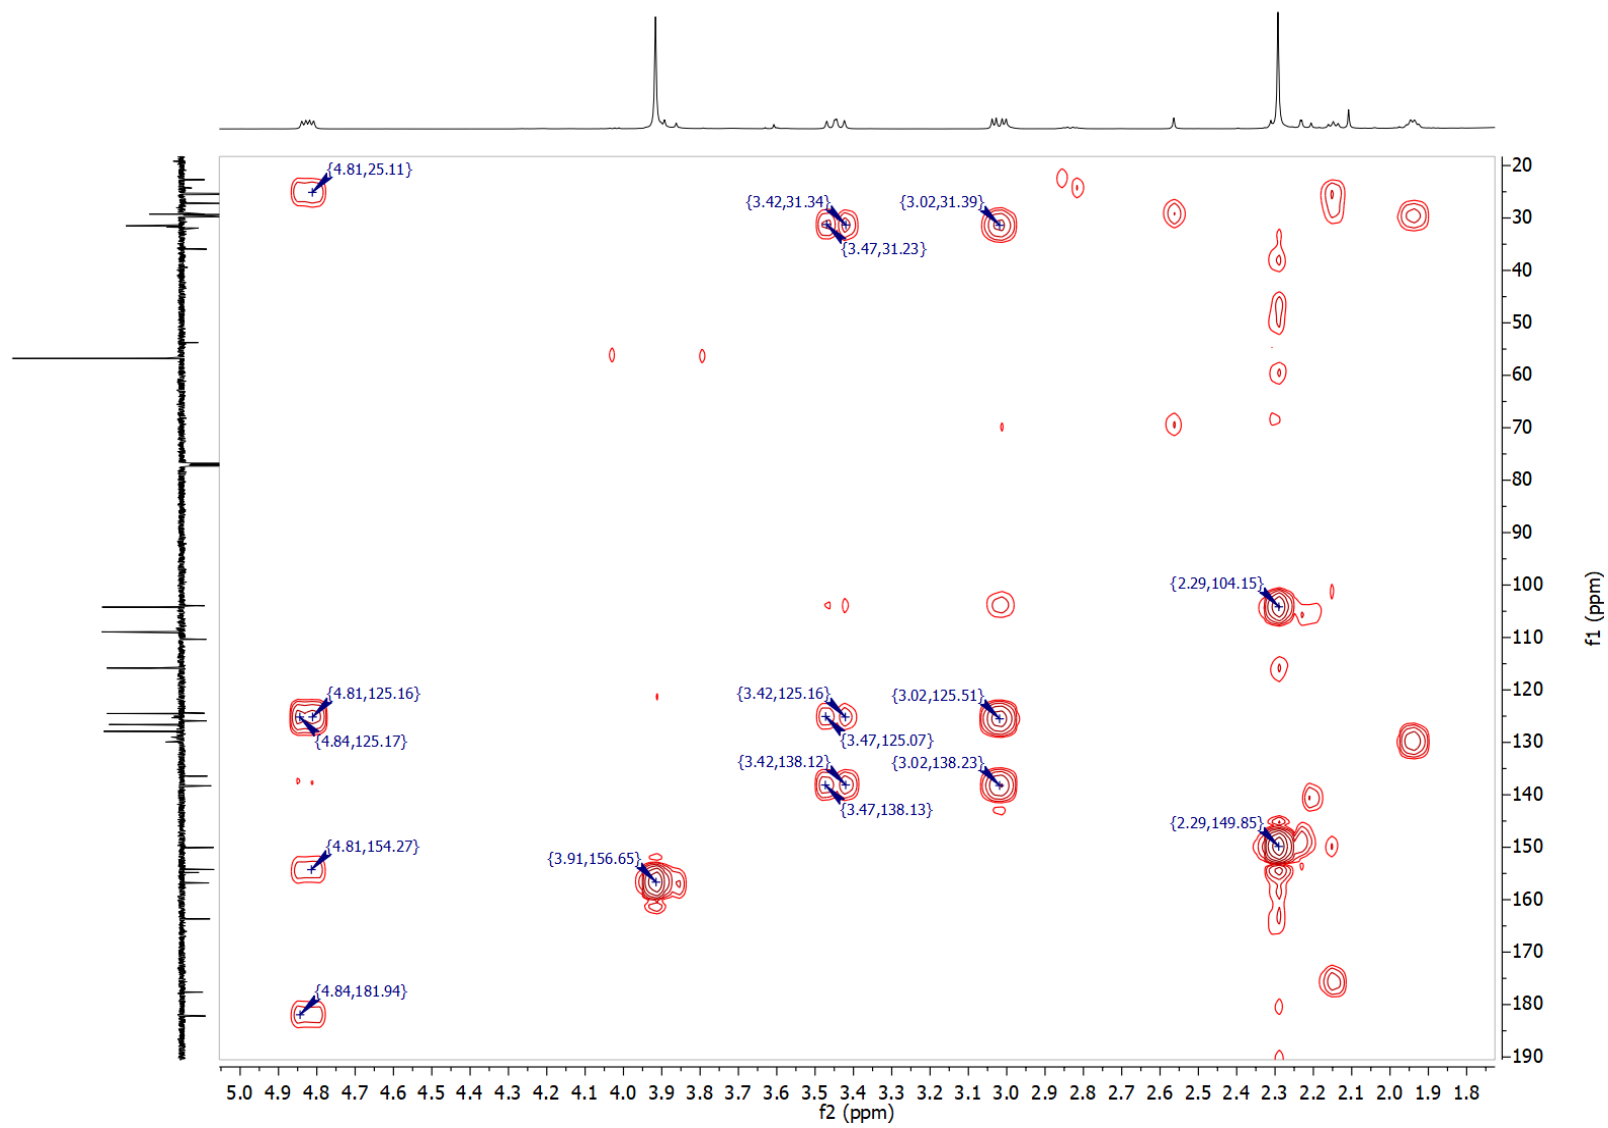

Figure S19. HMBC map from 1.5 to 5.0 ppm for 4 in CDCl<sub>3</sub>.



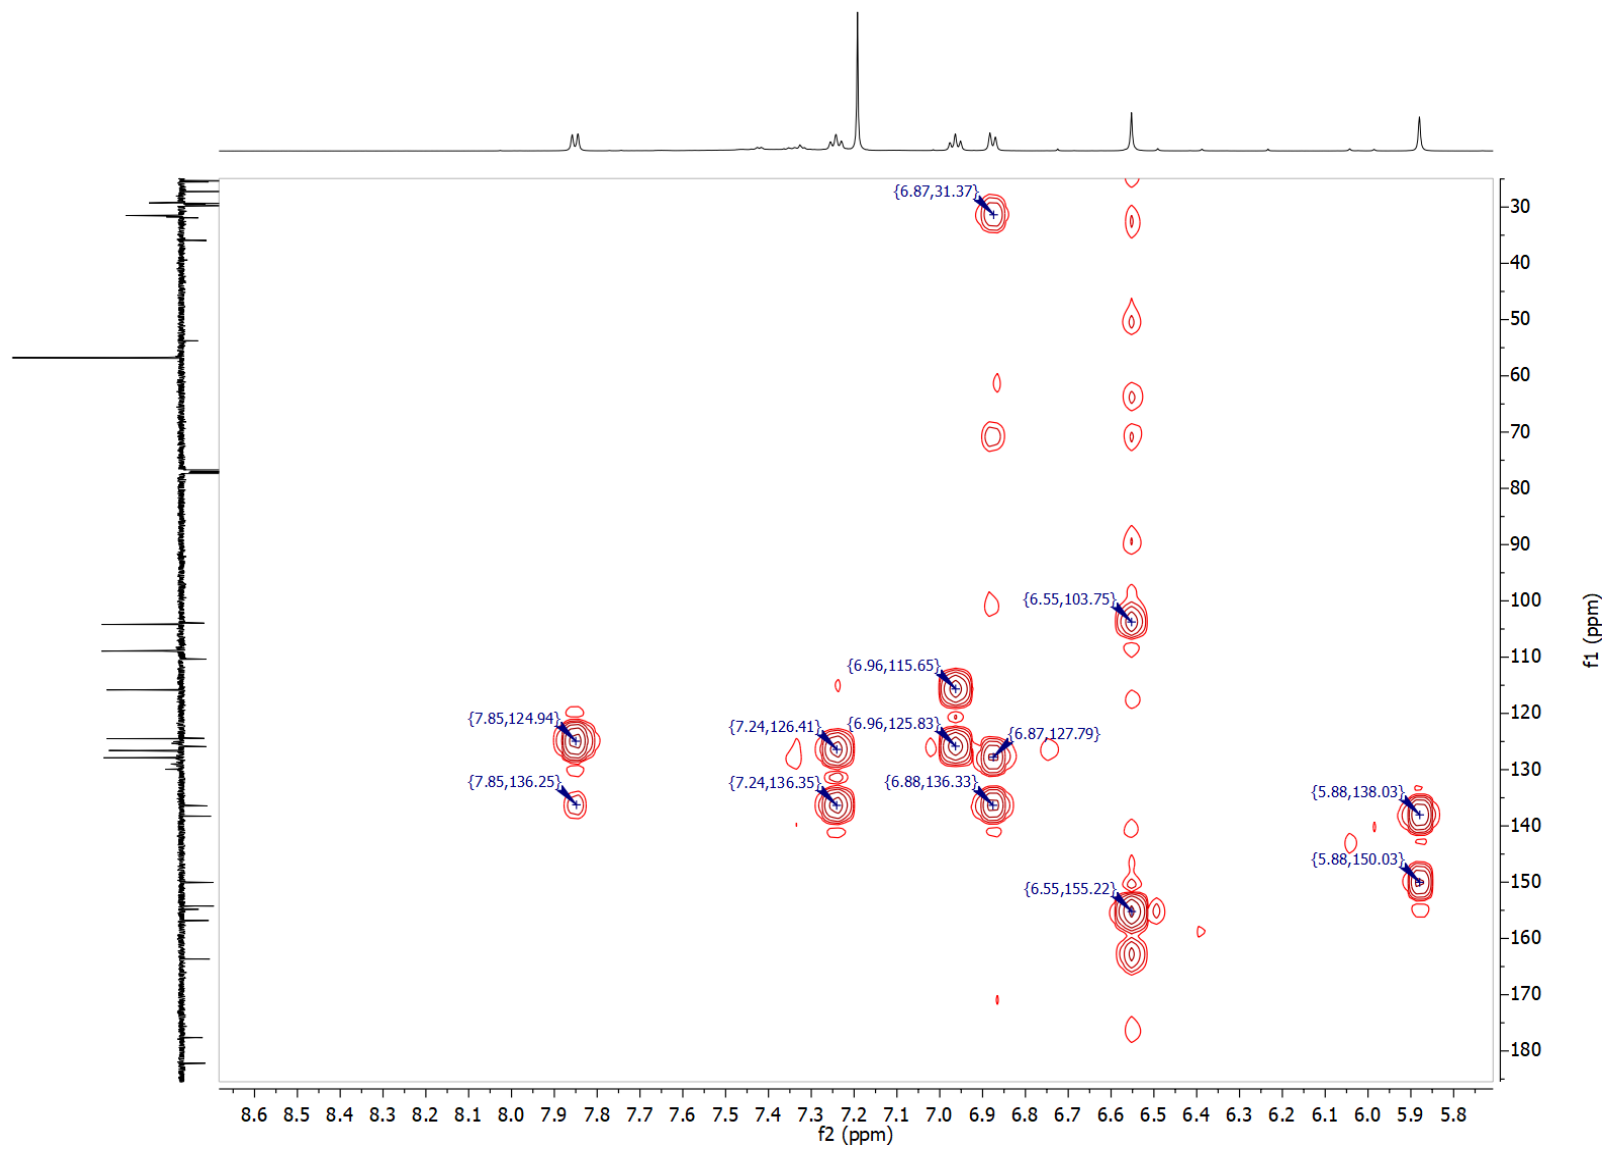

Figure S20. HMBC map from 5.5 to 8.5 ppm for 4 in CDCl<sub>3</sub>.

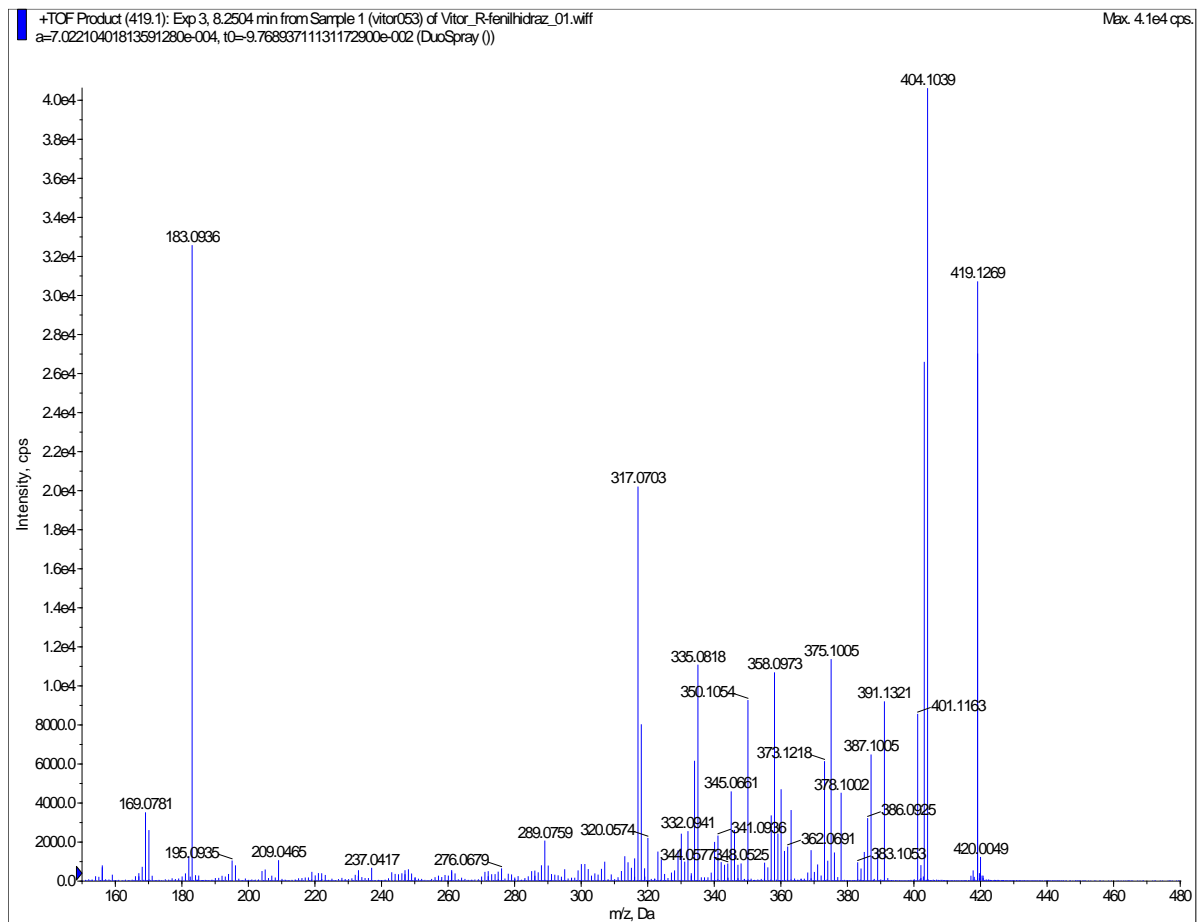

Figure S21. ESI+ CID spectra (30eV, N<sub>2</sub>) of 5.
